# Supplementary material
Source: PubMed Central journal article supplement (PMC5131836)
Supplement: ry161670suppa1.pdf [file ry161670suppa1.pdf]

Table E1. Overview of Individual Coronary Plaque Measurements by the Two Readers

| Scan | Group No. | Patient No. | AHA Label | Coronary Artery Segment | Segment Length Reader 1 (mm) | Lumen Volume Reader 1 (mm <sup>3</sup> ) | Total Plaque Reader 1 (mm <sup>3</sup> ) | Calcified Plaque Reader 1 (mm <sup>3</sup> ) | Noncalcified Plaque Reader 1 (mm <sup>3</sup> ) | Segment Length Reader 2 (mm) | Lumen Volume Reader 2 (mm <sup>3</sup> ) | Total Plaque Reader 2 (mm <sup>3</sup> ) | Calcified Plaque Reader 2 (mm <sup>3</sup> ) | Noncalcified Plaque Reader 2 (mm <sup>3</sup> ) | Segment Length Reader 1 Second Read (mm) | Lumen Volume Reader 1 Second Read (mm <sup>3</sup> ) | Total Plaque Reader 1 Second Read (mm <sup>3</sup> ) | Calcified Plaque Reader 1 Second Read (mm <sup>3</sup> ) | Noncalcified Plaque Reader 1 Second Read (mm <sup>3</sup> ) |
|------|-----------|-------------|-----------|-------------------------|------------------------------|------------------------------------------|------------------------------------------|----------------------------------------------|-------------------------------------------------|------------------------------|------------------------------------------|------------------------------------------|----------------------------------------------|-------------------------------------------------|------------------------------------------|------------------------------------------------------|------------------------------------------------------|----------------------------------------------------------|-------------------------------------------------------------|
| Scan | 1         | 1           | 1         | pRCA                    | 37.3                         | 129.4                                    | 60.4                                     | 1.9                                          | 58.5                                            | 37.0                         | 126.4                                    | 60.2                                     | 1.1                                          | 59.1                                            | NA                                       | NA                                                   | NA                                                   | NA                                                       | NA                                                          |
| Scan | 1         | 1           | 11        | pLCX                    | 13.0                         | 88.6                                     | 44.5                                     | 0.0                                          | 44.5                                            | 13.0                         | 88.6                                     | 44.6                                     | 0.0                                          | 44.6                                            | NA                                       | NA                                                   | NA                                                   | NA                                                       | NA                                                          |
| Scan | 1         | 1           | 13        | LCX                     | 92.0                         | 469.3                                    | 183.5                                    | 0.1                                          | 183.4                                           | 92.0                         | 469.3                                    | 185.9                                    | 0.1                                          | 185.8                                           | NA                                       | NA                                                   | NA                                                   | NA                                                       | NA                                                          |
| Scan | 1         | 1           | 5         | LM                      | 4.8                          | 64.8                                     | 31.4                                     | 0.0                                          | 31.3                                            | 5.0                          | 69.3                                     | 34.0                                     | 0.1                                          | 34.0                                            | NA                                       | NA                                                   | NA                                                   | NA                                                       | NA                                                          |
| Scan | 1         | 1           | 6         | pLAD                    | 20.0                         | 124.3                                    | 76.7                                     | 10.4                                         | 66.3                                            | 20.0                         | 124.3                                    | 76.3                                     | 10.6                                         | 65.7                                            | NA                                       | NA                                                   | NA                                                   | NA                                                       | NA                                                          |
| Scan | 1         | 1           | 7         | mLAD                    | 30.0                         | 125.4                                    | 74.8                                     | 16.7                                         | 58.1                                            | 30.0                         | 125.5                                    | 74.1                                     | 17.0                                         | 57.1                                            | NA                                       | NA                                                   | NA                                                   | NA                                                       | NA                                                          |
| Scan | 1         | 1           | 8         | dLAD                    | 74.7                         | 237.8                                    | 132.6                                    | 0.0                                          | 132.6                                           | 87.0                         | 268.1                                    | 137.5                                    | 0.3                                          | 137.2                                           | NA                                       | NA                                                   | NA                                                   | NA                                                       | NA                                                          |
| Scan | 1         | 2           | 1         | pRCA                    | 42.0                         | 405.2                                    | 202.1                                    | 0.2                                          | 201.9                                           | 42.0                         | 405.2                                    | 207.1                                    | 0.1                                          | 207.1                                           | NA                                       | NA                                                   | NA                                                   | NA                                                       | NA                                                          |
| Scan | 1         | 2           | 2         | mRCA                    | 46.0                         | 418.2                                    | 139.0                                    | 0.0                                          | 139.0                                           | 46.0                         | 416.7                                    | 140.9                                    | 0.0                                          | 140.9                                           | NA                                       | NA                                                   | NA                                                   | NA                                                       | NA                                                          |
| Scan | 1         | 2           | 3         | dRCA                    | 46.0                         | 370.9                                    | 118.2                                    | 1.4                                          | 116.8                                           | 46.0                         | 371.1                                    | 118.1                                    | 1.3                                          | 116.8                                           | NA                                       | NA                                                   | NA                                                   | NA                                                       | NA                                                          |
| Scan | 1         | 2           | 11        | pLCX                    | 12.0                         | 71.2                                     | 29.3                                     | 0.0                                          | 29.3                                            | 12.0                         | 71.2                                     | 29.6                                     | 0.0                                          | 29.6                                            | NA                                       | NA                                                   | NA                                                   | NA                                                       | NA                                                          |
| Scan | 1         | 2           | 13        | LCX                     | 29.5                         | 140.5                                    | 52.6                                     | 0.0                                          | 52.6                                            | 29.5                         | 140.5                                    | 52.6                                     | 0.0                                          | 52.6                                            | NA                                       | NA                                                   | NA                                                   | NA                                                       | NA                                                          |
| Scan | 1         | 2           | 5         | LM                      | 7.4                          | 100.0                                    | 27.1                                     | 0.0                                          | 27.1                                            | 7.0                          | 82.4                                     | 25.8                                     | 0.0                                          | 25.8                                            | NA                                       | NA                                                   | NA                                                   | NA                                                       | NA                                                          |
| Scan | 1         | 2           | 6         | pLAD                    | 20.5                         | 134.3                                    | 41.5                                     | 0.0                                          | 41.5                                            | 20.5                         | 134.3                                    | 41.5                                     | 0.0                                          | 41.5                                            | NA                                       | NA                                                   | NA                                                   | NA                                                       | NA                                                          |
| Scan | 1         | 2           | 7         | mLAD                    | 35.0                         | 180.6                                    | 96.3                                     | 16.4                                         | 79.9                                            | 35.0                         | 180.8                                    | 96.4                                     | 16.2                                         | 80.2                                            | NA                                       | NA                                                   | NA                                                   | NA                                                       | NA                                                          |
| Scan | 1         | 2           | 8         | dLAD                    | 42.0                         | 133.5                                    | 54.0                                     | 0.1                                          | 53.9                                            | 42.0                         | 133.5                                    | 56.8                                     | 0.1                                          | 56.7                                            | NA                                       | NA                                                   | NA                                                   | NA                                                       | NA                                                          |
| Scan | 1         | 3           | 11        | pLCX                    | 13.0                         | 95.9                                     | 30.7                                     | 0.5                                          | 30.2                                            | 13.0                         | 95.9                                     | 31.4                                     | 0.5                                          | 30.9                                            | NA                                       | NA                                                   | NA                                                   | NA                                                       | NA                                                          |
| Scan | 1         | 3           | 13        | LCX                     | 54.5                         | 247.5                                    | 81.0                                     | 0.2                                          | 80.8                                            | 48.1                         | 218.8                                    | 72.1                                     | 0.1                                          | 72.1                                            | NA                                       | NA                                                   | NA                                                   | NA                                                       | NA                                                          |
| Scan | 1         | 3           | 5         | LM                      | 9.0                          | 84.6                                     | 40.4                                     | 0.2                                          | 40.1                                            | 9.0                          | 84.6                                     | 40.4                                     | 0.2                                          | 40.1                                            | NA                                       | NA                                                   | NA                                                   | NA                                                       | NA                                                          |
| Scan | 1         | 3           | 6         | pLAD                    | 8.0                          | 47.8                                     | 22.7                                     | 0.3                                          | 22.5                                            | 8.0                          | 47.8                                     | 23.1                                     | 0.3                                          | 22.8                                            | NA                                       | NA                                                   | NA                                                   | NA                                                       | NA                                                          |
| Scan | 1         | 3           | 7         | mLAD                    | 29.5                         | 146.2                                    | 51.5                                     | 0.2                                          | 51.4                                            | 29.5                         | 146.2                                    | 56.9                                     | 0.2                                          | 56.6                                            | NA                                       | NA                                                   | NA                                                   | NA                                                       | NA                                                          |
| Scan | 1         | 3           | 8         | dLAD                    | 10.5                         | 42.1                                     | 14.6                                     | 0.0                                          | 14.6                                            | 10.5                         | 42.1                                     | 14.6                                     | 0.0                                          | 14.6                                            | NA                                       | NA                                                   | NA                                                   | NA                                                       | NA                                                          |
| Scan | 1         | 3           | 1         | pRCA                    | 33.5                         | 158.9                                    | 70.3                                     | 0.6                                          | 69.7                                            | 33.5                         | 158.4                                    | 70.8                                     | 1.0                                          | 69.8                                            | NA                                       | NA                                                   | NA                                                   | NA                                                       | NA                                                          |
| Scan | 1         | 3           | 2         | mRCA                    | 31.0                         | 141.4                                    | 49.1                                     | 0.0                                          | 49.1                                            | 31.0                         | 141.4                                    | 53.8                                     | 0.0                                          | 53.8                                            | NA                                       | NA                                                   | NA                                                   | NA                                                       | NA                                                          |
| Scan | 1         | 4           | 11        | pLCX                    | 14.0                         | 55.8                                     | 29.2                                     | 0.9                                          | 28.3                                            | 14.0                         | 55.8                                     | 29.2                                     | 0.9                                          | 28.3                                            | NA                                       | NA                                                   | NA                                                   | NA                                                       | NA                                                          |
| Scan | 1         | 4           | 13        | LCX                     | 34.6                         | 110.7                                    | 78.9                                     | 20.8                                         | 58.1                                            | 34.6                         | 110.7                                    | 78.9                                     | 20.8                                         | 58.1                                            | NA                                       | NA                                                   | NA                                                   | NA                                                       | NA                                                          |
| Scan | 1         | 4           | 6         | pLAD                    | 20.5                         | 116.2                                    | 86.8                                     | 27.0                                         | 59.7                                            | 20.5                         | 116.2                                    | 87.8                                     | 27.4                                         | 60.3                                            | NA                                       | NA                                                   | NA                                                   | NA                                                       | NA                                                          |

|      |   |   |    |      |      |       |       |      |       |      |       |       |      |       |    |    |    |    |    |
|------|---|---|----|------|------|-------|-------|------|-------|------|-------|-------|------|-------|----|----|----|----|----|
| Scan | 1 | 4 | 7  | mLAD | 49.5 | 146.3 | 160.0 | 43.3 | 116.7 | 49.5 | 146.3 | 164.8 | 44.1 | 120.7 | NA | NA | NA | NA | NA |
| Scan | 1 | 4 | 8  | dLAD | 32.5 | 81.5  | 27.9  | 0.0  | 27.9  | 32.5 | 81.5  | 27.9  | 0.0  | 27.9  | NA | NA | NA | NA | NA |
| Scan | 1 | 4 | 1  | pRCA | 36.9 | 262.4 | 304.7 | 82.2 | 222.5 | 38.7 | 298.2 | 327.7 | 79.9 | 247.8 | NA | NA | NA | NA | NA |
| Scan | 1 | 4 | 2  | mRCA | 53.5 | 294.5 | 231.3 | 38.6 | 192.7 | 42.6 | 300.5 | 261.3 | 46.8 | 214.5 | NA | NA | NA | NA | NA |
| Scan | 1 | 4 | 3  | dRCA | 78.5 | 317.4 | 123.6 | 1.3  | 122.4 | 39.4 | 204.3 | 118.8 | 27.6 | 91.2  | NA | NA | NA | NA | NA |
| Scan | 1 | 5 | 1  | pRCA | 26.9 | 142.0 | 81.9  | 6.3  | 75.6  | 24.0 | 117.6 | 66.6  | 0.6  | 66.0  | NA | NA | NA | NA | NA |
| Scan | 1 | 5 | 2  | mRCA | 24.8 | 135.7 | 82.9  | 0.7  | 82.2  | 26.5 | 135.0 | 104.6 | 0.7  | 103.9 | NA | NA | NA | NA | NA |
| Scan | 1 | 5 | 3  | dRCA | 26.5 | 99.8  | 70.6  | 0.4  | 70.2  | 26.5 | 99.8  | 70.6  | 0.4  | 70.2  | NA | NA | NA | NA | NA |
| Scan | 1 | 5 | 6  | pLAD | 5.5  | 22.9  | 12.0  | 1.3  | 10.7  | 5.5  | 22.9  | 12.0  | 1.0  | 11.0  | NA | NA | NA | NA | NA |
| Scan | 1 | 5 | 7  | mLAD | 28.0 | 124.9 | 57.6  | 2.0  | 55.6  | 28.0 | 118.4 | 64.7  | 1.9  | 62.8  | NA | NA | NA | NA | NA |
| Scan | 1 | 5 | 8  | dLAD | 11.9 | 35.5  | 17.2  | 0.4  | 16.8  | 36.1 | 106.7 | 42.0  | 0.4  | 41.6  | NA | NA | NA | NA | NA |
| Scan | 1 | 5 | 11 | pLCX | 25.1 | 112.6 | 55.4  | 0.0  | 55.4  | 28.4 | 127.1 | 63.9  | 0.0  | 63.9  | NA | NA | NA | NA | NA |
| Scan | 1 | 5 | 12 | OM1  | 80.1 | 204.1 | 104.6 | 3.1  | 101.6 | 80.1 | 204.1 | 104.6 | 3.1  | 101.6 | NA | NA | NA | NA | NA |
| Scan | 1 | 6 | 1  | pRCA | 31.5 | 431.5 | 164.6 | 30.0 | 134.6 | 31.5 | 431.5 | 165.1 | 30.0 | 135.0 | NA | NA | NA | NA | NA |
| Scan | 1 | 6 | 2  | mRCA | 35.0 | 438.4 | 187.9 | 35.0 | 152.9 | 35.0 | 438.8 | 187.6 | 34.7 | 152.8 | NA | NA | NA | NA | NA |
| Scan | 1 | 6 | 3  | dRCA | 34.5 | 363.6 | 100.8 | 0.3  | 100.4 | 34.5 | 363.6 | 101.8 | 0.3  | 101.4 | NA | NA | NA | NA | NA |
| Scan | 1 | 6 | 11 | pLCX | 14.0 | 86.8  | 53.4  | 10.3 | 43.1  | 14.0 | 87.8  | 54.2  | 9.7  | 44.6  | NA | NA | NA | NA | NA |
| Scan | 1 | 6 | 13 | LCX  | 11.0 | 42.6  | 16.5  | 0.0  | 16.5  | 11.0 | 42.6  | 20.1  | 0.0  | 20.1  | NA | NA | NA | NA | NA |
| Scan | 1 | 6 | 5  | LM   | 20.5 | 244.5 | 121.5 | 21.3 | 100.3 | 20.5 | 246.6 | 126.4 | 21.2 | 105.2 | NA | NA | NA | NA | NA |
| Scan | 1 | 6 | 6  | pLAD | 18.5 | 147.1 | 153.0 | 81.8 | 71.1  | 18.5 | 148.7 | 155.9 | 82.2 | 73.8  | NA | NA | NA | NA | NA |
| Scan | 1 | 6 | 7  | mLAD | 16.0 | 117.0 | 83.1  | 25.7 | 57.4  | 16.0 | 117.0 | 88.2  | 25.8 | 62.4  | NA | NA | NA | NA | NA |
| Scan | 1 | 6 | 8  | dLAD | 58.5 | 232.4 | 139.0 | 31.0 | 108.0 | 58.5 | 234.9 | 145.8 | 31.0 | 114.7 | NA | NA | NA | NA | NA |
| Scan | 1 | 7 | 5  | LM   | 15.6 | 144.9 | 56.1  | 1.8  | 54.4  | 15.6 | 144.9 | 56.1  | 1.8  | 54.4  | NA | NA | NA | NA | NA |
| Scan | 1 | 7 | 6  | pLAD | 15.9 | 137.0 | 102.5 | 38.0 | 64.5  | 15.9 | 137.0 | 102.5 | 38.0 | 64.5  | NA | NA | NA | NA | NA |
| Scan | 1 | 7 | 7  | mLAD | 49.5 | 364.6 | 102.2 | 8.0  | 94.2  | 49.5 | 364.6 | 102.2 | 8.0  | 94.2  | NA | NA | NA | NA | NA |
| Scan | 1 | 7 | 8  | dLAD | 52.0 | 178.4 | 78.5  | 0.0  | 78.5  | 52.0 | 178.4 | 78.5  | 0.0  | 78.5  | NA | NA | NA | NA | NA |
| Scan | 1 | 7 | 11 | pLCX | 13.5 | 55.5  | 39.4  | 6.4  | 33.0  | 13.5 | 55.5  | 39.3  | 6.2  | 33.1  | NA | NA | NA | NA | NA |
| Scan | 1 | 7 | 13 | LCX  | 26.5 | 81.1  | 33.8  | 0.0  | 33.8  | 26.5 | 81.1  | 34.6  | 0.0  | 34.6  | NA | NA | NA | NA | NA |
| Scan | 1 | 7 | 3  | dRCA | 41.0 | 441.7 | 140.9 | 19.2 | 121.7 | 41.0 | 441.7 | 140.9 | 24.0 | 116.9 | NA | NA | NA | NA | NA |
| Scan | 1 | 8 | 1  | pRCA | 38.0 | 381.9 | 241.4 | 26.7 | 214.7 | 38.0 | 381.9 | 241.4 | 25.8 | 215.5 | NA | NA | NA | NA | NA |
| Scan | 1 | 8 | 2  | mRCA | 28.5 | 225.8 | 121.0 | 9.3  | 111.6 | 28.5 | 228.0 | 126.8 | 9.3  | 117.5 | NA | NA | NA | NA | NA |
| Scan | 1 | 8 | 3  | dRCA | 31.5 | 172.6 | 54.5  | 0.0  | 54.5  | 31.5 | 172.6 | 54.5  | 0.2  | 54.4  | NA | NA | NA | NA | NA |
| Scan | 1 | 8 | 5  | LM   | 8.8  | 87.9  | 68.4  | 2.7  | 65.7  | 9.4  | 99.5  | 78.1  | 2.5  | 75.6  | NA | NA | NA | NA | NA |
| Scan | 1 | 8 | 6  | pLAD | 22.5 | 142.8 | 156.5 | 68.7 | 87.9  | 22.5 | 131.5 | 170.8 | 65.5 | 105.3 | NA | NA | NA | NA | NA |
| Scan | 1 | 8 | 7  | mLAD | 29.5 | 132.0 | 68.6  | 9.3  | 59.3  | 29.5 | 132.0 | 70.0  | 9.1  | 60.8  | NA | NA | NA | NA | NA |
| Scan | 1 | 8 | 8  | dLAD | 39.5 | 121.6 | 47.7  | 0.0  | 47.7  | 39.5 | 121.6 | 48.1  | 0.0  | 48.1  | NA | NA | NA | NA | NA |

|      |   |    |    |      |      |       |       |      |       |      |       |       |      |       |    |    |    |    |    |
|------|---|----|----|------|------|-------|-------|------|-------|------|-------|-------|------|-------|----|----|----|----|----|
| Scan | 1 | 8  | 11 | pLCX | 12.0 | 46.2  | 26.6  | 0.0  | 26.6  | 13.5 | 54.6  | 34.4  | 2.1  | 32.3  | NA | NA | NA | NA | NA |
| Scan | 1 | 8  | 13 | LCX  | 73.0 | 233.3 | 105.4 | 0.0  | 105.4 | 73.0 | 233.3 | 108.8 | 0.0  | 108.7 | NA | NA | NA | NA | NA |
| Scan | 1 | 9  | 11 | pLCX | 46.5 | 240.1 | 203.6 | 27.2 | 176.4 | 46.5 | 240.1 | 206.0 | 24.5 | 181.5 | NA | NA | NA | NA | NA |
| Scan | 1 | 9  | 13 | LCX  | 22.0 | 43.9  | 32.5  | 2.3  | 30.1  | 22.0 | 43.9  | 29.1  | 1.4  | 27.7  | NA | NA | NA | NA | NA |
| Scan | 1 | 9  | 5  | LM   | 15.5 | 176.0 | 80.6  | 4.4  | 76.2  | 15.5 | 176.0 | 84.1  | 4.4  | 79.7  | NA | NA | NA | NA | NA |
| Scan | 1 | 9  | 6  | pLAD | 11.0 | 71.5  | 41.9  | 0.1  | 41.8  | 11.0 | 71.5  | 43.1  | 0.1  | 43.0  | NA | NA | NA | NA | NA |
| Scan | 1 | 9  | 7  | mLAD | 16.0 | 107.9 | 64.2  | 4.2  | 60.0  | 16.0 | 107.9 | 64.4  | 4.2  | 60.2  | NA | NA | NA | NA | NA |
| Scan | 1 | 9  | 2  | mRCA | 53.0 | 154.6 | 68.9  | 0.2  | 68.7  | 53.0 | 154.6 | 68.9  | 0.2  | 68.7  | NA | NA | NA | NA | NA |
| Scan | 1 | 9  | 3  | dRCA | 32.6 | 63.8  | 27.4  | 0.1  | 27.3  | 40.9 | 78.6  | 32.3  | 0.1  | 32.2  | NA | NA | NA | NA | NA |
| Scan | 1 | 10 | 1  | pRCA | 35.5 | 248.1 | 142.7 | 13.0 | 129.7 | 35.5 | 248.1 | 142.7 | 13.0 | 129.7 | NA | NA | NA | NA | NA |
| Scan | 1 | 10 | 2  | mRCA | 20.0 | 129.4 | 64.7  | 0.0  | 64.7  | 20.0 | 129.4 | 64.7  | 0.0  | 64.7  | NA | NA | NA | NA | NA |
| Scan | 1 | 10 | 5  | LM   | 6.3  | 79.8  | 23.2  | 1.1  | 22.1  | 6.3  | 79.8  | 23.2  | 1.1  | 22.1  | NA | NA | NA | NA | NA |
| Scan | 1 | 10 | 6  | pLAD | 11.2 | 57.1  | 30.5  | 0.7  | 29.8  | 11.2 | 57.1  | 30.5  | 0.7  | 29.8  | NA | NA | NA | NA | NA |
| Scan | 1 | 10 | 7  | mLAD | 30.0 | 151.1 | 74.2  | 0.4  | 73.8  | 30.0 | 151.1 | 82.1  | 0.4  | 81.8  | NA | NA | NA | NA | NA |
| Scan | 1 | 10 | 8  | dLAD | 41.7 | 108.2 | 49.1  | 0.0  | 49.1  | 41.7 | 108.2 | 52.2  | 0.0  | 52.2  | NA | NA | NA | NA | NA |
| Scan | 1 | 10 | 11 | pLCX | 29.3 | 165.4 | 109.5 | 1.3  | 108.2 | 29.3 | 164.6 | 110.3 | 1.4  | 108.9 | NA | NA | NA | NA | NA |
| Scan | 1 | 10 | 13 | LCX  | 61.7 | 296.3 | 141.0 | 0.4  | 140.6 | 61.7 | 294.2 | 143.9 | 2.4  | 141.5 | NA | NA | NA | NA | NA |
| Scan | 1 | 11 | 1  | pRCA | 35.0 | 461.6 | 199.5 | 6.4  | 193.2 | 35.0 | 460.6 | 200.6 | 5.9  | 194.7 | NA | NA | NA | NA | NA |
| Scan | 1 | 11 | 2  | mRCA | 37.5 | 379.4 | 110.7 | 0.0  | 110.6 | 37.5 | 376.3 | 113.8 | 0.0  | 113.7 | NA | NA | NA | NA | NA |
| Scan | 1 | 11 | 3  | dRCA | 36.5 | 277.2 | 119.7 | 17.9 | 101.8 | 36.5 | 277.2 | 119.7 | 17.8 | 101.9 | NA | NA | NA | NA | NA |
| Scan | 1 | 11 | 5  | LM   | 16.0 | 225.0 | 99.4  | 0.0  | 99.4  | 16.0 | 225.0 | 99.4  | 0.0  | 99.4  | NA | NA | NA | NA | NA |
| Scan | 1 | 11 | 6  | pLAD | 6.0  | 73.8  | 46.7  | 5.4  | 41.3  | 6.0  | 70.6  | 49.9  | 4.5  | 45.4  | NA | NA | NA | NA | NA |
| Scan | 1 | 11 | 7  | mLAD | 30.0 | 197.2 | 108.3 | 18.9 | 89.4  | 30.0 | 184.9 | 121.9 | 19.0 | 102.9 | NA | NA | NA | NA | NA |
| Scan | 1 | 11 | 8  | dLAD | 81.0 | 380.1 | 155.1 | 16.8 | 138.3 | 81.0 | 380.1 | 155.1 | 16.7 | 138.4 | NA | NA | NA | NA | NA |
| Scan | 1 | 11 | 11 | pLCX | 22.5 | 197.1 | 117.0 | 25.7 | 91.3  | 22.5 | 192.4 | 121.6 | 25.5 | 96.2  | NA | NA | NA | NA | NA |
| Scan | 1 | 11 | 13 | LCX  | 60.5 | 219.3 | 115.3 | 7.8  | 107.5 | 60.5 | 219.3 | 119.3 | 7.8  | 111.6 | NA | NA | NA | NA | NA |
| Scan | 1 | 12 | 1  | pRCA | 20.6 | 146.5 | 104.9 | 25.5 | 79.5  | 18.5 | 133.6 | 78.8  | 11.8 | 67.0  | NA | NA | NA | NA | NA |
| Scan | 1 | 12 | 2  | mRCA | 32.0 | 177.1 | 183.0 | 56.6 | 126.5 | 32.0 | 177.1 | 183.0 | 56.6 | 126.5 | NA | NA | NA | NA | NA |
| Scan | 1 | 12 | 3  | dRCA | 30.5 | 172.2 | 74.4  | 0.0  | 74.4  | 30.1 | 169.1 | 73.5  | 0.0  | 73.5  | NA | NA | NA | NA | NA |
| Scan | 1 | 12 | 6  | pLAD | 16.8 | 60.1  | 229.5 | 70.5 | 159.0 | 15.7 | 53.4  | 215.8 | 66.7 | 149.0 | NA | NA | NA | NA | NA |
| Scan | 1 | 12 | 8  | dLAD | 39.4 | 111.0 | 66.1  | 2.0  | 64.1  | 38.7 | 108.7 | 62.5  | 2.0  | 60.5  | NA | NA | NA | NA | NA |
| Scan | 1 | 12 | 11 | pLCX | 21.6 | 79.9  | 268.6 | 77.5 | 191.1 | 20.9 | 77.7  | 259.5 | 77.1 | 182.4 | NA | NA | NA | NA | NA |
| Scan | 1 | 13 | 1  | pRCA | 31.5 | 255.0 | 116.2 | 0.1  | 116.1 | 33.5 | 279.2 | 124.7 | 0.1  | 124.6 | NA | NA | NA | NA | NA |
| Scan | 1 | 13 | 2  | mRCA | 27.5 | 303.2 | 120.6 | 0.0  | 120.5 | 35.5 | 389.9 | 149.9 | 0.0  | 149.9 | NA | NA | NA | NA | NA |
| Scan | 1 | 13 | 3  | dRCA | 23.5 | 216.7 | 61.7  | 0.0  | 61.7  | 35.5 | 197.1 | 62.5  | 0.0  | 62.5  | NA | NA | NA | NA | NA |
| Scan | 1 | 13 | 5  | LM   | 9.5  | 85.1  | 45.6  | 1.6  | 44.0  | 9.5  | 85.1  | 48.7  | 1.8  | 46.9  | NA | NA | NA | NA | NA |

|      |   |    |    |      |      |       |       |       |       |      |       |       |       |       |    |    |    |    |    |
|------|---|----|----|------|------|-------|-------|-------|-------|------|-------|-------|-------|-------|----|----|----|----|----|
| Scan | 1 | 13 | 6  | pLAD | 22.5 | 203.4 | 114.7 | 17.3  | 97.5  | 22.5 | 203.4 | 116.8 | 17.3  | 99.5  | NA | NA | NA | NA | NA |
| Scan | 1 | 13 | 7  | mLAD | 40.0 | 196.0 | 89.3  | 6.0   | 83.4  | 40.0 | 196.0 | 91.0  | 6.6   | 84.4  | NA | NA | NA | NA | NA |
| Scan | 1 | 13 | 11 | pLCX | 12.5 | 72.2  | 26.5  | 1.7   | 24.8  | 12.2 | 70.6  | 26.9  | 1.6   | 25.3  | NA | NA | NA | NA | NA |
| Scan | 1 | 13 | 13 | LCX  | 50.5 | 205.5 | 86.8  | 0.0   | 86.8  | 55.7 | 217.6 | 93.1  | 0.0   | 93.1  | NA | NA | NA | NA | NA |
| Scan | 1 | 14 | 11 | pLCX | 39.6 | 232.7 | 167.6 | 29.3  | 138.3 | 39.6 | 232.7 | 167.6 | 29.3  | 138.3 | NA | NA | NA | NA | NA |
| Scan | 1 | 14 | 13 | LCX  | 54.5 | 174.8 | 81.5  | 0.2   | 81.3  | 58.0 | 185.0 | 88.5  | 0.2   | 88.3  | NA | NA | NA | NA | NA |
| Scan | 1 | 14 | 7  | mLAD | 40.1 | 152.0 | 149.4 | 50.0  | 99.4  | 39.9 | 151.2 | 149.2 | 51.2  | 98.0  | NA | NA | NA | NA | NA |
| Scan | 1 | 14 | 8  | dLAD | 49.3 | 169.4 | 49.3  | 0.9   | 48.5  | 49.4 | 170.2 | 49.6  | 0.8   | 48.8  | NA | NA | NA | NA | NA |
| Scan | 1 | 14 | 1  | pRCA | 37.2 | 220.6 | 161.5 | 48.4  | 113.2 | 35.0 | 212.5 | 144.4 | 37.3  | 107.1 | NA | NA | NA | NA | NA |
| Scan | 1 | 14 | 2  | mRCA | 37.0 | 134.8 | 94.4  | 25.2  | 69.2  | 37.0 | 134.8 | 94.4  | 24.0  | 70.4  | NA | NA | NA | NA | NA |
| Scan | 1 | 14 | 3  | dRCA | 38.9 | 128.3 | 39.6  | 0.0   | 39.6  | 36.5 | 121.6 | 37.1  | 0.0   | 37.1  | NA | NA | NA | NA | NA |
| Scan | 1 | 15 | 1  | pRCA | 40.3 | 519.7 | 185.8 | 8.4   | 177.4 | 37.5 | 472.4 | 166.6 | 8.2   | 158.5 | NA | NA | NA | NA | NA |
| Scan | 1 | 15 | 2  | mRCA | 41.0 | 418.1 | 162.7 | 13.5  | 149.2 | 41.0 | 418.1 | 165.4 | 13.5  | 151.9 | NA | NA | NA | NA | NA |
| Scan | 1 | 15 | 3  | dRCA | 40.5 | 330.7 | 102.9 | 18.0  | 84.9  | 40.5 | 330.7 | 108.6 | 18.3  | 90.3  | NA | NA | NA | NA | NA |
| Scan | 1 | 15 | 11 | pLCX | 14.9 | 90.9  | 94.3  | 41.6  | 52.8  | 13.5 | 83.0  | 77.2  | 29.2  | 48.0  | NA | NA | NA | NA | NA |
| Scan | 1 | 15 | 13 | LCX  | 25.8 | 76.5  | 29.7  | 0.0   | 29.7  | 26.0 | 76.7  | 32.1  | 0.0   | 32.1  | NA | NA | NA | NA | NA |
| Scan | 1 | 15 | 5  | LM   | 13.6 | 151.7 | 103.9 | 29.7  | 74.2  | 12.0 | 133.2 | 74.6  | 28.3  | 46.3  | NA | NA | NA | NA | NA |
| Scan | 1 | 15 | 6  | pLAD | 28.7 | 158.2 | 294.8 | 117.3 | 177.5 | 24.0 | 132.3 | 258.1 | 102.5 | 155.6 | NA | NA | NA | NA | NA |
| Scan | 1 | 15 | 7  | mLAD | 43.8 | 232.3 | 190.1 | 51.4  | 138.7 | 33.0 | 198.8 | 177.5 | 52.1  | 125.4 | NA | NA | NA | NA | NA |
| Scan | 1 | 15 | 8  | dLAD | 55.6 | 158.3 | 66.1  | 0.0   | 66.1  | 54.0 | 188.2 | 89.2  | 13.3  | 75.9  | NA | NA | NA | NA | NA |
| Scan | 1 | 16 | 2  | mRCA | 40.0 | 268.4 | 319.8 | 112.6 | 207.2 | 40.0 | 284.6 | 303.6 | 104.7 | 198.8 | NA | NA | NA | NA | NA |
| Scan | 1 | 16 | 3  | dRCA | 39.5 | 248.8 | 251.4 | 119.3 | 132.1 | 39.5 | 248.8 | 251.4 | 119.4 | 132.0 | NA | NA | NA | NA | NA |
| Scan | 1 | 16 | 11 | pLCX | 14.0 | 43.3  | 95.1  | 34.4  | 60.7  | 14.0 | 43.3  | 95.1  | 35.6  | 59.5  | NA | NA | NA | NA | NA |
| Scan | 1 | 16 | 13 | LCX  | 22.0 | 65.7  | 44.8  | 6.7   | 38.1  | 22.0 | 65.7  | 45.1  | 7.5   | 37.6  | NA | NA | NA | NA | NA |
| Scan | 1 | 16 | 5  | LM   | 4.0  | 17.8  | 46.6  | 13.0  | 33.6  | 3.5  | 13.5  | 43.5  | 19.3  | 24.2  | NA | NA | NA | NA | NA |
| Scan | 1 | 16 | 7  | mLAD | 35.0 | 194.8 | 110.2 | 20.5  | 89.7  | 47.3 | 197.2 | 111.2 | 15.9  | 95.3  | NA | NA | NA | NA | NA |
| Scan | 1 | 16 | 8  | dLAD | 83.7 | 259.4 | 129.5 | 1.0   | 128.4 | 69.8 | 202.1 | 95.2  | 0.7   | 94.6  | NA | NA | NA | NA | NA |
| Scan | 1 | 17 | 5  | LM   | 7.0  | 111.7 | 52.1  | 1.7   | 50.5  | 7.0  | 111.7 | 57.4  | 3.6   | 53.8  | NA | NA | NA | NA | NA |
| Scan | 1 | 17 | 6  | pLAD | 19.5 | 106.5 | 194.0 | 90.8  | 103.1 | 19.5 | 106.5 | 200.5 | 92.1  | 108.4 | NA | NA | NA | NA | NA |
| Scan | 1 | 17 | 8  | dLAD | 29.0 | 91.5  | 181.8 | 79.5  | 102.3 | 29.0 | 91.5  | 193.4 | 83.3  | 110.1 | NA | NA | NA | NA | NA |
| Scan | 1 | 17 | 11 | pLCX | 33.0 | 243.6 | 387.6 | 239.5 | 148.1 | 33.0 | 243.6 | 391.3 | 239.7 | 151.6 | NA | NA | NA | NA | NA |
| Scan | 1 | 17 | 13 | LCX  | 27.6 | 114.5 | 237.4 | 141.0 | 96.4  | 27.6 | 114.5 | 237.4 | 141.0 | 96.4  | NA | NA | NA | NA | NA |
| Scan | 1 | 17 | 1  | pRCA | 36.0 | 334.6 | 395.1 | 164.3 | 230.8 | 36.0 | 333.7 | 396.1 | 165.3 | 230.8 | NA | NA | NA | NA | NA |
| Scan | 1 | 17 | 2  | mRCA | 34.5 | 176.3 | 593.0 | 347.4 | 245.6 | 34.5 | 175.8 | 593.4 | 347.9 | 245.6 | NA | NA | NA | NA | NA |
| Scan | 1 | 17 | 3  | dRCA | 35.0 | 136.0 | 493.6 | 264.8 | 228.8 | 35.0 | 135.8 | 493.8 | 265.0 | 228.9 | NA | NA | NA | NA | NA |
| Scan | 1 | 18 | 1  | pRCA | 42.0 | 264.0 | 129.0 | 2.9   | 126.1 | 42.0 | 264.0 | 129.0 | 2.9   | 126.1 | NA | NA | NA | NA | NA |

|      |   |    |    |      |       |       |       |       |       |       |       |       |       |       |       |       |       |       |       |
|------|---|----|----|------|-------|-------|-------|-------|-------|-------|-------|-------|-------|-------|-------|-------|-------|-------|-------|
| Scan | 1 | 18 | 2  | mRCA | 16.8  | 73.0  | 38.1  | 0.0   | 38.1  | 16.8  | 73.0  | 38.1  | 0.0   | 38.1  | NA    | NA    | NA    | NA    | NA    |
| Scan | 1 | 18 | 5  | LM   | 12.5  | 191.6 | 68.4  | 1.5   | 67.0  | 12.5  | 191.6 | 70.9  | 1.5   | 69.5  | NA    | NA    | NA    | NA    | NA    |
| Scan | 1 | 18 | 6  | pLAD | 23.5  | 206.1 | 94.4  | 2.2   | 92.2  | 23.5  | 206.1 | 99.2  | 2.4   | 96.8  | NA    | NA    | NA    | NA    | NA    |
| Scan | 1 | 18 | 7  | mLAD | 31.5  | 130.8 | 63.8  | 0.1   | 63.7  | 31.5  | 130.8 | 63.8  | 0.1   | 63.7  | NA    | NA    | NA    | NA    | NA    |
| Scan | 1 | 18 | 8  | dLAD | 48.1  | 198.4 | 71.6  | 0.2   | 71.4  | 48.1  | 198.4 | 72.7  | 0.2   | 72.5  | NA    | NA    | NA    | NA    | NA    |
| Scan | 1 | 18 | 11 | pLCX | 15.5  | 93.0  | 53.6  | 5.1   | 48.5  | 15.5  | 93.0  | 54.5  | 5.3   | 49.2  | NA    | NA    | NA    | NA    | NA    |
| Scan | 1 | 18 | 13 | LCX  | 29.1  | 110.3 | 68.1  | 0.6   | 67.5  | 29.1  | 110.3 | 75.9  | 0.4   | 75.5  | NA    | NA    | NA    | NA    | NA    |
| Scan | 1 | 19 | 5  | LM   | 25.5  | 361.1 | 126.0 | 1.4   | 124.6 | 25.5  | 361.1 | 126.0 | 1.4   | 124.6 | NA    | NA    | NA    | NA    | NA    |
| Scan | 1 | 19 | 6  | pLAD | 21.0  | 176.8 | 49.4  | 0.5   | 48.9  | 21.0  | 176.8 | 50.9  | 0.5   | 50.4  | NA    | NA    | NA    | NA    | NA    |
| Scan | 1 | 19 | 7  | mLAD | 42.0  | 225.1 | 76.9  | 0.5   | 76.4  | 42.0  | 225.1 | 82.7  | 0.6   | 82.1  | NA    | NA    | NA    | NA    | NA    |
| Scan | 1 | 19 | 8  | dLAD | 23.5  | 79.1  | 33.6  | 0.0   | 33.6  | 23.5  | 79.1  | 34.3  | 0.0   | 34.3  | NA    | NA    | NA    | NA    | NA    |
| Scan | 1 | 19 | 11 | pLCX | 27.0  | 218.8 | 96.1  | 1.9   | 94.2  | 27.0  | 218.8 | 100.0 | 2.0   | 98.0  | NA    | NA    | NA    | NA    | NA    |
| Scan | 1 | 19 | 13 | LCX  | 31.0  | 135.6 | 65.4  | 0.0   | 65.4  | 31.0  | 135.6 | 67.1  | 0.0   | 67.1  | NA    | NA    | NA    | NA    | NA    |
| Scan | 1 | 19 | 1  | pRCA | 27.5  | 280.6 | 99.2  | 0.0   | 99.2  | 27.5  | 280.6 | 99.2  | 0.0   | 99.2  | NA    | NA    | NA    | NA    | NA    |
| Scan | 1 | 19 | 2  | mRCA | 29.5  | 206.0 | 82.0  | 0.0   | 82.0  | 29.5  | 206.0 | 83.0  | 0.0   | 83.0  | NA    | NA    | NA    | NA    | NA    |
| Scan | 1 | 19 | 3  | dRCA | 30.0  | 134.5 | 50.9  | 0.0   | 50.9  | 30.0  | 134.5 | 50.9  | 0.0   | 50.9  | NA    | NA    | NA    | NA    | NA    |
| Scan | 1 | 20 | 1  | pRCA | 37.0  | 271.5 | 238.8 | 42.8  | 196.0 | 37.0  | 281.2 | 229.1 | 38.0  | 191.1 | NA    | NA    | NA    | NA    | NA    |
| Scan | 1 | 20 | 2  | mRCA | 38.0  | 192.4 | 105.8 | 6.9   | 98.9  | 38.0  | 194.3 | 104.0 | 6.3   | 97.7  | NA    | NA    | NA    | NA    | NA    |
| Scan | 1 | 20 | 3  | dRCA | 38.5  | 130.2 | 58.2  | 2.4   | 55.8  | 38.5  | 130.2 | 58.2  | 2.4   | 55.8  | NA    | NA    | NA    | NA    | NA    |
| Scan | 1 | 20 | 11 | pLCX | 30.0  | 303.1 | 234.0 | 54.6  | 179.4 | 30.0  | 303.1 | 234.0 | 54.6  | 179.4 | NA    | NA    | NA    | NA    | NA    |
| Scan | 1 | 20 | 13 | LCX  | 72.0  | 252.5 | 164.2 | 23.9  | 140.3 | 54.3  | 208.1 | 144.8 | 23.8  | 121.0 | NA    | NA    | NA    | NA    | NA    |
| Scan | 1 | 20 | 5  | LM   | 10.0  | 161.0 | 82.2  | 14.3  | 67.9  | 10.0  | 161.0 | 82.2  | 14.3  | 67.9  | NA    | NA    | NA    | NA    | NA    |
| Scan | 1 | 20 | 6  | pLAD | 22.0  | 142.8 | 266.7 | 151.4 | 115.3 | 22.0  | 142.8 | 266.7 | 151.3 | 115.5 | NA    | NA    | NA    | NA    | NA    |
| Scan | 1 | 20 | 7  | mLAD | 29.5  | 74.1  | 356.6 | 216.7 | 139.9 | 29.5  | 58.2  | 372.5 | 238.1 | 134.4 | NA    | NA    | NA    | NA    | NA    |
| Scan | 1 | 20 | 8  | dLAD | 85.0  | 274.2 | 181.0 | 24.7  | 156.3 | 85.0  | 274.2 | 183.5 | 23.8  | 159.7 | NA    | NA    | NA    | NA    | NA    |
| Scan | 2 | 21 | 1  | pRCA | 23.7  | 211.7 | 148.7 | 33.5  | 115.2 | 21.6  | 234.6 | 128.7 | 32.5  | 96.3  | 25.3  | 224.9 | 153.3 | 32.3  | 121.0 |
| Scan | 2 | 21 | 2  | mRCA | 43.7  | 317.5 | 119.8 | 9.0   | 110.7 | 38.0  | 248.5 | 93.8  | 5.6   | 88.2  | 43.4  | 311.1 | 118.2 | 8.5   | 109.7 |
| Scan | 2 | 21 | 3  | dRCA | 71.7  | 295.0 | 101.8 | 12.2  | 89.6  | 73.4  | 298.5 | 103.2 | 12.1  | 91.1  | 73.4  | 298.5 | 103.2 | 12.2  | 91.0  |
| Scan | 2 | 21 | 5  | LM   | 11.4  | 118.1 | 52.8  | 4.5   | 48.3  | 6.9   | 60.9  | 38.0  | 4.5   | 33.5  | 11.1  | 112.9 | 51.0  | 4.5   | 46.5  |
| Scan | 2 | 21 | 6  | pLAD | 20.0  | 186.1 | 187.9 | 21.1  | 166.8 | 17.5  | 161.2 | 161.7 | 18.8  | 143.0 | 19.4  | 180.9 | 181.1 | 19.4  | 161.7 |
| Scan | 2 | 21 | 7  | mLAD | 29.8  | 204.1 | 341.3 | 144.9 | 196.4 | 31.6  | 226.7 | 360.4 | 141.7 | 218.7 | 29.7  | 207.0 | 341.0 | 137.3 | 203.7 |
| Scan | 2 | 21 | 8  | dLAD | 113.8 | 358.8 | 164.8 | 21.8  | 143.0 | 114.4 | 361.1 | 171.8 | 28.5  | 143.3 | 114.4 | 361.1 | 171.8 | 26.1  | 145.7 |
| Scan | 2 | 21 | 11 | pLCX | 14.6  | 119.8 | 66.1  | 12.5  | 53.5  | 13.9  | 113.5 | 66.7  | 12.8  | 54.0  | 13.9  | 113.5 | 66.7  | 12.8  | 54.0  |
| Scan | 2 | 21 | 13 | LCX  | 34.3  | 225.4 | 189.2 | 29.8  | 159.4 | 65.3  | 350.9 | 278.7 | 47.8  | 230.9 | 35.3  | 234.9 | 192.0 | 33.9  | 158.1 |
| Scan | 2 | 22 | 11 | pLCX | 16.7  | 97.9  | 45.9  | 0.8   | 45.2  | 12.5  | 71.6  | 32.4  | 0.2   | 32.2  | 11.6  | 66.3  | 29.9  | 0.2   | 29.7  |
| Scan | 2 | 22 | 13 | LCX  | 27.9  | 83.7  | 44.5  | 3.1   | 41.4  | 31.0  | 101.8 | 53.0  | 3.2   | 49.9  | 31.9  | 107.0 | 55.5  | 3.2   | 52.4  |

|      |   |    |    |      |      |       |       |       |       |      |       |       |       |       |      |       |       |       |       |
|------|---|----|----|------|------|-------|-------|-------|-------|------|-------|-------|-------|-------|------|-------|-------|-------|-------|
| Scan | 2 | 22 | 5  | LM   | 13.5 | 119.2 | 52.4  | 0.3   | 52.0  | 14.5 | 147.7 | 58.1  | 0.8   | 57.3  | 14.5 | 147.7 | 58.1  | 0.8   | 57.3  |
| Scan | 2 | 22 | 6  | pLAD | 21.5 | 177.4 | 69.1  | 0.6   | 68.6  | 21.5 | 177.4 | 69.1  | 0.6   | 68.6  | 21.5 | 177.4 | 69.1  | 0.6   | 68.6  |
| Scan | 2 | 22 | 7  | mLAD | 44.2 | 320.7 | 93.7  | 0.2   | 93.5  | 43.5 | 317.8 | 92.3  | 0.2   | 92.1  | 43.5 | 317.8 | 92.3  | 0.2   | 92.1  |
| Scan | 2 | 22 | 8  | dLAD | 49.9 | 153.7 | 77.6  | 0.5   | 77.1  | 64.0 | 192.8 | 92.2  | 0.4   | 91.8  | 50.6 | 156.6 | 78.9  | 0.1   | 78.8  |
| Scan | 2 | 22 | 1  | pRCA | 30.0 | 163.4 | 68.2  | 5.0   | 63.2  | 31.2 | 172.0 | 71.3  | 5.2   | 66.1  | 29.3 | 159.2 | 66.2  | 4.9   | 61.2  |
| Scan | 2 | 22 | 2  | mRCA | 30.9 | 180.9 | 60.8  | 0.1   | 60.7  | 30.5 | 175.6 | 59.5  | 0.2   | 59.3  | 32.4 | 188.3 | 64.6  | 0.2   | 64.5  |
| Scan | 2 | 22 | 3  | dRCA | 25.4 | 85.2  | 31.8  | 0.0   | 31.8  | 30.0 | 102.2 | 36.2  | 0.0   | 36.2  | 24.6 | 82.0  | 30.0  | 0.0   | 30.0  |
| Scan | 2 | 23 | 1  | pRCA | 26.7 | 100.7 | 370.5 | 142.4 | 228.2 | 22.2 | 79.2  | 332.8 | 130.6 | 202.3 | 22.2 | 79.2  | 332.8 | 130.6 | 202.3 |
| Scan | 2 | 23 | 2  | mRCA | 29.1 | 168.3 | 239.7 | 57.9  | 181.8 | 29.4 | 170.4 | 244.1 | 58.8  | 185.3 | 29.4 | 170.4 | 244.1 | 58.8  | 185.3 |
| Scan | 2 | 23 | 3  | dRCA | 24.2 | 85.6  | 126.6 | 53.8  | 72.8  | 24.2 | 85.6  | 126.6 | 50.1  | 76.4  | 24.2 | 85.6  | 126.6 | 50.1  | 76.4  |
| Scan | 2 | 23 | 5  | LM   | 22.8 | 171.4 | 149.8 | 41.1  | 108.6 | 23.2 | 173.5 | 159.9 | 49.2  | 110.7 | 23.2 | 173.5 | 159.9 | 49.2  | 110.7 |
| Scan | 2 | 23 | 6  | pLAD | 21.8 | 79.4  | 266.7 | 168.1 | 98.6  | 21.0 | 77.1  | 254.9 | 158.5 | 96.4  | 21.0 | 77.1  | 254.9 | 159.4 | 95.5  |
| Scan | 2 | 23 | 7  | mLAD | 19.9 | 42.7  | 88.2  | 42.0  | 46.2  | 20.1 | 43.0  | 89.9  | 39.2  | 50.7  | 20.1 | 43.0  | 89.9  | 42.7  | 47.2  |
| Scan | 2 | 23 | 8  | dLAD | 16.1 | 30.3  | 21.1  | 2.4   | 18.7  | 17.1 | 32.4  | 24.6  | 2.3   | 22.3  | 17.1 | 32.4  | 24.6  | 3.4   | 21.2  |
| Scan | 2 | 23 | 11 | pLCX | 14.6 | 43.6  | 168.4 | 105.3 | 63.1  | 11.5 | 34.9  | 139.7 | 86.4  | 53.3  | 14.1 | 42.3  | 167.6 | 105.3 | 62.3  |
| Scan | 2 | 23 | 13 | LCX  | 25.0 | 63.2  | 34.4  | 0.0   | 34.4  | 27.0 | 68.3  | 37.9  | 0.0   | 37.9  | 25.5 | 64.5  | 35.2  | 0.0   | 35.2  |
| Scan | 2 | 24 | 1  | pRCA | 43.3 | 433.1 | 233.1 | 34.4  | 198.8 | 41.2 | 396.0 | 219.4 | 32.0  | 187.3 | 41.2 | 396.0 | 219.4 | 32.0  | 187.3 |
| Scan | 2 | 24 | 2  | mRCA | 22.8 | 134.7 | 85.1  | 0.0   | 85.1  | 19.1 | 107.3 | 72.8  | 0.0   | 72.8  | 19.1 | 107.3 | 72.8  | 0.0   | 72.8  |
| Scan | 2 | 24 | 3  | dRCA | 86.9 | 525.5 | 244.1 | 4.8   | 239.3 | 86.9 | 525.5 | 244.1 | 4.8   | 239.3 | 86.9 | 525.5 | 244.1 | 4.8   | 239.3 |
| Scan | 2 | 24 | 5  | LM   | 10.0 | 168.2 | 48.5  | 0.5   | 48.1  | 10.0 | 158.9 | 57.8  | 2.4   | 55.4  | 10.0 | 158.9 | 57.8  | 2.4   | 55.4  |
| Scan | 2 | 24 | 6  | pLAD | 14.5 | 154.0 | 32.8  | 0.1   | 32.7  | 14.5 | 103.8 | 83.0  | 2.7   | 80.4  | 14.5 | 147.3 | 39.6  | 1.2   | 38.4  |
| Scan | 2 | 24 | 7  | mLAD | 30.0 | 164.9 | 116.8 | 17.8  | 99.0  | 30.0 | 138.0 | 143.7 | 16.7  | 127.0 | 30.0 | 164.9 | 116.8 | 17.5  | 99.3  |
| Scan | 2 | 24 | 8  | dLAD | 79.0 | 302.9 | 115.0 | 0.0   | 115.0 | 79.0 | 292.0 | 125.9 | 0.0   | 125.9 | 79.0 | 292.0 | 125.9 | 0.0   | 125.9 |
| Scan | 2 | 24 | 11 | pLCX | 18.2 | 99.0  | 45.8  | 1.8   | 44.0  | 16.5 | 90.9  | 41.4  | 1.8   | 39.6  | 16.5 | 90.9  | 41.4  | 1.8   | 39.6  |
| Scan | 2 | 24 | 13 | LCX  | 24.1 | 80.6  | 50.0  | 0.0   | 50.0  | 44.5 | 152.3 | 85.3  | 0.0   | 85.3  | 26.7 | 91.5  | 56.9  | 0.0   | 56.9  |
| Scan | 2 | 25 | 1  | pRCA | 32.2 | 178.9 | 85.7  | 0.3   | 85.4  | 30.8 | 173.4 | 81.3  | 0.5   | 80.8  | 32.2 | 178.9 | 85.7  | 0.3   | 85.4  |
| Scan | 2 | 25 | 2  | mRCA | 27.9 | 121.5 | 70.9  | 0.0   | 70.8  | 29.3 | 127.0 | 75.3  | 0.0   | 75.3  | 27.9 | 121.5 | 70.9  | 0.0   | 70.8  |
| Scan | 2 | 25 | 3  | dRCA | 18.4 | 61.0  | 37.8  | 0.0   | 37.8  | 18.4 | 61.0  | 37.8  | 0.0   | 37.8  | 18.4 | 61.0  | 37.8  | 0.0   | 37.8  |
| Scan | 2 | 25 | 5  | LM   | 13.7 | 147.1 | 64.9  | 0.9   | 64.0  | 13.0 | 142.9 | 60.9  | 0.7   | 60.2  | 13.0 | 142.9 | 60.9  | 0.3   | 60.6  |
| Scan | 2 | 25 | 6  | pLAD | 23.3 | 113.7 | 70.5  | 3.6   | 67.0  | 24.0 | 117.9 | 74.6  | 4.8   | 69.7  | 24.0 | 117.9 | 74.6  | 4.2   | 70.4  |
| Scan | 2 | 25 | 7  | mLAD | 30.0 | 128.3 | 51.5  | 0.1   | 51.4  | 30.0 | 128.3 | 51.5  | 0.1   | 51.4  | 30.0 | 128.3 | 51.5  | 0.1   | 51.4  |
| Scan | 2 | 25 | 8  | dLAD | 51.0 | 171.3 | 84.2  | 0.0   | 84.2  | 51.0 | 171.3 | 84.2  | 0.0   | 84.2  | 51.0 | 171.3 | 84.2  | 0.0   | 84.2  |
| Scan | 2 | 25 | 11 | pLCX | 15.3 | 94.1  | 35.0  | 0.1   | 35.0  | 19.9 | 124.8 | 45.9  | 0.8   | 45.1  | 12.8 | 85.0  | 33.3  | 0.8   | 32.5  |
| Scan | 2 | 25 | 13 | LCX  | 75.0 | 354.5 | 105.3 | 0.0   | 105.3 | 39.5 | 206.3 | 63.6  | 0.0   | 63.6  | 78.7 | 373.9 | 113.0 | 0.0   | 113.0 |
| Scan | 2 | 26 | 11 | pLCX | 28.5 | 139.0 | 57.7  | 3.2   | 54.5  | 25.0 | 119.7 | 48.8  | 1.1   | 47.6  | 28.5 | 133.7 | 56.4  | 1.9   | 54.5  |
| Scan | 2 | 26 | 13 | LCX  | 14.7 | 47.7  | 18.0  | 0.0   | 18.0  | 17.5 | 59.6  | 24.6  | 0.8   | 23.8  | 14.0 | 45.6  | 17.0  | 0.0   | 17.0  |

|      |   |    |    |      |      |        |       |       |       |      |        |       |       |       |      |        |       |       |       |
|------|---|----|----|------|------|--------|-------|-------|-------|------|--------|-------|-------|-------|------|--------|-------|-------|-------|
| Scan | 2 | 26 | 5  | LM   | 15.9 | 216.5  | 79.4  | 3.8   | 75.6  | 17.5 | 239.9  | 86.0  | 4.4   | 81.6  | 15.1 | 203.2  | 75.9  | 3.7   | 72.2  |
| Scan | 2 | 26 | 6  | pLAD | 12.5 | 136.2  | 50.7  | 3.1   | 47.6  | 13.0 | 139.7  | 57.5  | 3.7   | 53.8  | 13.3 | 149.5  | 54.3  | 3.2   | 51.0  |
| Scan | 2 | 26 | 7  | mLAD | 18.2 | 204.7  | 120.1 | 44.6  | 75.6  | 13.8 | 165.3  | 87.0  | 31.4  | 55.6  | 16.9 | 199.0  | 108.0 | 36.7  | 71.4  |
| Scan | 2 | 26 | 8  | dLAD | 32.8 | 113.2  | 75.1  | 7.7   | 67.4  | 35.2 | 125.7  | 94.8  | 19.7  | 75.1  | 34.1 | 118.8  | 87.2  | 15.6  | 71.6  |
| Scan | 2 | 26 | 1  | pRCA | 43.4 | 975.6  | 294.7 | 45.9  | 248.8 | 40.1 | 919.9  | 271.0 | 45.6  | 225.4 | 41.5 | 945.9  | 282.0 | 45.6  | 236.4 |
| Scan | 2 | 26 | 2  | mRCA | 36.2 | 400.6  | 132.4 | 5.4   | 127.0 | 44.0 | 493.8  | 165.2 | 5.7   | 159.5 | 42.5 | 467.7  | 154.2 | 5.7   | 148.5 |
| Scan | 2 | 26 | 3  | dRCA | 52.4 | 428.9  | 144.7 | 15.8  | 128.9 | 43.5 | 371.6  | 125.7 | 14.2  | 111.5 | 47.9 | 391.4  | 135.6 | 15.8  | 119.8 |
| Scan | 2 | 27 | 1  | pRCA | 48.5 | 1534.0 | 418.1 | 131.3 | 286.8 | 48.1 | 1515.1 | 415.2 | 131.1 | 284.1 | 48.1 | 1515.1 | 415.2 | 131.1 | 284.1 |
| Scan | 2 | 27 | 2  | mRCA | 20.8 | 531.5  | 188.2 | 7.4   | 180.8 | 22.5 | 575.9  | 196.6 | 7.6   | 189.0 | 22.5 | 575.9  | 196.6 | 7.6   | 189.0 |
| Scan | 2 | 27 | 3  | dRCA | 36.0 | 805.0  | 273.7 | 43.0  | 230.7 | 36.1 | 817.0  | 274.1 | 42.9  | 231.2 | 33.9 | 753.5  | 264.8 | 42.9  | 221.8 |
| Scan | 2 | 27 | 5  | LM   | 4.5  | 141.5  | 34.2  | 0.0   | 34.2  | 4.3  | 135.3  | 32.2  | 0.0   | 32.2  | 4.3  | 135.3  | 32.2  | 0.0   | 32.2  |
| Scan | 2 | 27 | 6  | pLAD | 28.2 | 424.6  | 202.3 | 28.6  | 173.7 | 22.7 | 359.8  | 148.6 | 13.1  | 135.5 | 28.5 | 430.8  | 204.3 | 28.5  | 175.8 |
| Scan | 2 | 27 | 7  | mLAD | 25.0 | 201.4  | 97.8  | 19.6  | 78.3  | 28.8 | 260.0  | 149.5 | 34.8  | 114.8 | 26.1 | 204.2  | 101.1 | 19.6  | 81.5  |
| Scan | 2 | 27 | 8  | dLAD | 31.3 | 117.7  | 63.1  | 0.0   | 63.1  | 35.1 | 136.8  | 69.4  | 0.2   | 69.2  | 30.3 | 114.9  | 59.9  | 0.0   | 59.9  |
| Scan | 2 | 27 | 11 | pLCX | 7.1  | 100.9  | 41.1  | 0.0   | 41.1  | 6.0  | 82.8   | 32.7  | 0.0   | 32.7  | 6.3  | 89.1   | 37.3  | 0.0   | 37.3  |
| Scan | 2 | 27 | 13 | LCX  | 40.0 | 360.9  | 220.2 | 46.8  | 173.4 | 41.1 | 372.6  | 222.0 | 52.4  | 169.6 | 40.5 | 369.4  | 221.5 | 47.5  | 174.0 |
| Scan | 2 | 28 | 11 | pLCX | 21.6 | 133.9  | 52.5  | 1.2   | 51.3  | 22.2 | 137.0  | 54.1  | 0.3   | 53.8  | 22.2 | 137.0  | 54.1  | 0.3   | 53.8  |
| Scan | 2 | 28 | 13 | LCX  | 23.5 | 52.6   | 35.4  | 4.1   | 31.4  | 6.8  | 21.6   | 13.0  | 2.5   | 10.5  | 22.2 | 48.9   | 33.7  | 2.5   | 31.2  |
| Scan | 2 | 28 | 5  | LM   | 12.7 | 123.8  | 48.6  | 0.5   | 48.1  | 13.0 | 138.5  | 53.3  | 0.8   | 52.5  | 12.3 | 122.3  | 47.4  | 0.5   | 46.9  |
| Scan | 2 | 28 | 6  | pLAD | 17.7 | 97.6   | 57.4  | 2.8   | 54.6  | 20.0 | 107.9  | 64.3  | 2.8   | 61.5  | 17.9 | 98.3   | 57.9  | 2.8   | 55.1  |
| Scan | 2 | 28 | 7  | mLAD | 27.1 | 113.3  | 55.0  | 0.0   | 55.0  | 24.2 | 100.8  | 47.6  | 0.0   | 47.6  | 27.3 | 114.1  | 55.7  | 0.0   | 55.7  |
| Scan | 2 | 28 | 8  | dLAD | 30.7 | 101.7  | 43.8  | 0.0   | 43.8  | 33.3 | 121.0  | 47.6  | 0.0   | 47.6  | 32.3 | 117.3  | 45.9  | 0.0   | 45.9  |
| Scan | 2 | 28 | 1  | pRCA | 33.6 | 252.4  | 161.7 | 0.1   | 161.6 | 34.5 | 275.0  | 168.0 | 0.7   | 167.4 | 34.5 | 275.0  | 168.0 | 0.7   | 167.4 |
| Scan | 2 | 28 | 2  | mRCA | 37.0 | 259.6  | 117.4 | 0.0   | 117.4 | 37.0 | 259.6  | 117.4 | 0.0   | 117.4 | 37.0 | 259.6  | 117.4 | 0.0   | 117.4 |
| Scan | 2 | 28 | 3  | dRCA | 44.9 | 196.7  | 81.6  | 0.3   | 81.3  | 37.0 | 174.3  | 68.2  | 0.3   | 68.0  | 44.9 | 196.7  | 81.6  | 0.3   | 81.3  |
| Scan | 2 | 29 | 1  | pRCA | 34.9 | 157.0  | 78.0  | 0.0   | 78.0  | 37.0 | 174.8  | 100.9 | 2.5   | 98.4  | 34.9 | 157.0  | 78.0  | 0.0   | 78.0  |
| Scan | 2 | 29 | 2  | mRCA | 32.5 | 125.9  | 48.4  | 0.5   | 47.9  | 32.5 | 125.9  | 49.9  | 0.5   | 49.4  | 32.5 | 125.9  | 49.9  | 0.5   | 49.4  |
| Scan | 2 | 29 | 3  | dRCA | 19.0 | 50.0   | 27.8  | 0.0   | 27.8  | 19.0 | 50.0   | 37.8  | 0.0   | 37.8  | 19.0 | 50.0   | 37.8  | 0.0   | 37.8  |
| Scan | 2 | 29 | 11 | pLCX | 45.5 | 352.2  | 356.9 | 123.3 | 233.6 | 45.5 | 346.3  | 362.8 | 123.3 | 239.4 | 45.5 | 346.3  | 362.8 | 123.3 | 239.4 |
| Scan | 2 | 29 | 13 | LCX  | 68.5 | 194.9  | 271.0 | 138.2 | 132.8 | 68.5 | 194.9  | 271.0 | 138.1 | 132.9 | 68.5 | 194.9  | 271.0 | 138.1 | 132.9 |
| Scan | 2 | 29 | 5  | LM   | 7.0  | 115.4  | 46.4  | 2.6   | 43.9  | 7.5  | 134.2  | 50.1  | 2.9   | 47.2  | 7.0  | 115.4  | 46.4  | 2.6   | 43.9  |
| Scan | 2 | 29 | 6  | pLAD | 15.5 | 76.3   | 141.4 | 71.1  | 70.3  | 15.5 | 76.3   | 141.4 | 70.9  | 70.5  | 15.5 | 76.3   | 141.4 | 70.9  | 70.5  |
| Scan | 2 | 29 | 7  | mLAD | 30.0 | 114.3  | 96.1  | 22.8  | 73.3  | 30.0 | 105.2  | 105.2 | 22.8  | 82.5  | 30.0 | 105.2  | 105.2 | 22.8  | 82.5  |
| Scan | 2 | 29 | 8  | dLAD | 44.4 | 152.8  | 48.7  | 0.0   | 48.6  | 44.4 | 152.8  | 48.7  | 0.0   | 48.6  | 44.4 | 152.8  | 48.7  | 0.0   | 48.6  |
| Scan | 2 | 30 | 5  | LM   | 12.5 | 137.0  | 58.4  | 4.6   | 53.8  | 12.5 | 137.0  | 58.4  | 4.6   | 53.8  | 12.5 | 137.0  | 58.4  | 4.6   | 53.8  |
| Scan | 2 | 30 | 6  | pLAD | 4.9  | 17.8   | 46.7  | 23.8  | 22.8  | 4.8  | 17.3   | 44.8  | 22.5  | 22.2  | 4.8  | 17.3   | 44.8  | 22.5  | 22.2  |

|      |   |    |    |      |      |       |       |       |       |       |       |       |       |       |       |       |       |       |       |
|------|---|----|----|------|------|-------|-------|-------|-------|-------|-------|-------|-------|-------|-------|-------|-------|-------|-------|
| Scan | 2 | 30 | 7  | mLAD | 32.7 | 71.3  | 312.9 | 222.7 | 90.2  | 36.5  | 85.5  | 325.1 | 226.7 | 98.3  | 36.5  | 85.5  | 325.1 | 226.7 | 98.3  |
| Scan | 2 | 30 | 8  | dLAD | 36.7 | 100.4 | 91.3  | 29.6  | 61.7  | 39.3  | 99.5  | 89.2  | 27.8  | 61.4  | 33.0  | 86.7  | 81.0  | 27.8  | 53.2  |
| Scan | 2 | 30 | 11 | pLCX | 24.0 | 77.4  | 129.4 | 68.9  | 60.6  | 25.5  | 83.2  | 137.7 | 73.0  | 64.6  | 25.5  | 83.2  | 137.7 | 73.0  | 64.6  |
| Scan | 2 | 30 | 12 | OM1  | 51.0 | 126.5 | 160.4 | 81.3  | 79.1  | 49.5  | 120.7 | 152.1 | 77.1  | 75.1  | 49.5  | 120.7 | 152.1 | 77.1  | 75.1  |
| Scan | 2 | 30 | 1  | pRCA | 25.4 | 163.7 | 223.0 | 100.2 | 122.9 | 22.3  | 139.3 | 207.6 | 99.9  | 107.7 | 25.4  | 163.7 | 223.0 | 100.2 | 122.9 |
| Scan | 2 | 30 | 2  | mRCA | 29.7 | 126.5 | 255.7 | 114.2 | 141.5 | 28.0  | 119.4 | 251.2 | 114.3 | 136.9 | 28.0  | 119.4 | 251.2 | 113.9 | 137.3 |
| Scan | 2 | 30 | 3  | dRCA | 38.6 | 172.2 | 152.5 | 66.0  | 86.5  | 40.3  | 179.2 | 157.1 | 65.9  | 91.2  | 40.3  | 179.2 | 157.1 | 66.1  | 90.9  |
| Scan | 2 | 31 | 5  | LM   | 9.5  | 107.8 | 44.1  | 0.9   | 43.2  | 12.8  | 126.5 | 56.1  | 1.0   | 55.1  | 9.5   | 107.8 | 44.1  | 0.9   | 43.2  |
| Scan | 2 | 31 | 6  | pLAD | 32.5 | 185.8 | 167.6 | 33.3  | 134.3 | 29.2  | 156.8 | 166.0 | 33.2  | 132.8 | 32.5  | 175.5 | 177.9 | 33.3  | 144.7 |
| Scan | 2 | 31 | 7  | mLAD | 30.5 | 111.8 | 140.9 | 45.1  | 95.8  | 29.1  | 107.5 | 138.6 | 45.0  | 93.7  | 30.5  | 111.8 | 140.9 | 45.0  | 95.9  |
| Scan | 2 | 31 | 8  | dLAD | 47.6 | 157.0 | 124.1 | 25.4  | 98.7  | 98.9  | 287.6 | 174.2 | 26.4  | 147.8 | 47.6  | 157.0 | 124.1 | 26.4  | 97.7  |
| Scan | 2 | 31 | 11 | pLCX | 30.0 | 148.9 | 130.6 | 40.5  | 90.1  | 33.4  | 160.4 | 143.8 | 40.2  | 103.6 | 30.0  | 144.6 | 135.0 | 40.2  | 94.7  |
| Scan | 2 | 31 | 12 | OM1  | 81.5 | 259.6 | 123.6 | 6.2   | 117.4 | 78.1  | 243.9 | 114.8 | 6.1   | 108.6 | 81.5  | 259.6 | 123.6 | 6.1   | 117.5 |
| Scan | 2 | 31 | 1  | pRCA | 32.0 | 254.6 | 156.5 | 9.8   | 146.6 | 32.5  | 261.2 | 165.5 | 11.1  | 154.4 | 32.0  | 249.8 | 161.2 | 9.7   | 151.5 |
| Scan | 2 | 31 | 2  | mRCA | 35.0 | 237.1 | 125.2 | 4.0   | 121.3 | 35.0  | 227.4 | 134.9 | 4.0   | 130.9 | 35.0  | 227.4 | 134.9 | 4.0   | 130.9 |
| Scan | 2 | 31 | 3  | dRCA | 35.0 | 146.1 | 82.8  | 0.8   | 82.1  | 33.1  | 140.0 | 80.0  | 0.7   | 79.3  | 35.0  | 146.1 | 82.8  | 0.7   | 82.1  |
| Scan | 2 | 32 | 1  | pRCA | 36.5 | 276.9 | 118.2 | 0.8   | 117.4 | 36.5  | 276.9 | 118.2 | 0.8   | 117.4 | 36.5  | 276.9 | 118.2 | 0.8   | 117.4 |
| Scan | 2 | 32 | 2  | mRCA | 40.5 | 216.0 | 115.7 | 8.3   | 107.4 | 37.5  | 201.3 | 111.5 | 8.3   | 103.2 | 40.5  | 216.0 | 115.7 | 8.3   | 107.4 |
| Scan | 2 | 32 | 3  | dRCA | 34.5 | 143.3 | 98.6  | 19.9  | 78.7  | 37.5  | 158.0 | 102.8 | 19.9  | 82.9  | 34.5  | 143.3 | 98.6  | 19.9  | 78.7  |
| Scan | 2 | 32 | 5  | LM   | 11.6 | 202.4 | 87.5  | 2.7   | 84.7  | 11.0  | 168.1 | 85.4  | 2.3   | 83.1  | 11.0  | 168.1 | 85.4  | 2.4   | 83.0  |
| Scan | 2 | 32 | 6  | pLAD | 21.4 | 143.5 | 92.9  | 11.0  | 81.9  | 21.4  | 143.5 | 92.9  | 13.3  | 79.6  | 21.4  | 143.5 | 92.9  | 11.0  | 81.9  |
| Scan | 2 | 32 | 7  | mLAD | 11.1 | 20.7  | 59.4  | 28.9  | 30.5  | 10.0  | 18.3  | 58.2  | 41.4  | 16.8  | 10.0  | 18.3  | 58.2  | 28.9  | 29.3  |
| Scan | 2 | 32 | 11 | pLCX | 15.2 | 129.7 | 68.7  | 0.2   | 68.5  | 14.8  | 125.9 | 67.7  | 0.2   | 67.4  | 14.8  | 125.9 | 67.7  | 0.2   | 67.4  |
| Scan | 2 | 32 | 13 | LCX  | 42.8 | 289.1 | 98.5  | 0.9   | 97.5  | 39.6  | 273.2 | 107.1 | 0.8   | 106.3 | 43.2  | 282.1 | 110.4 | 1.0   | 109.4 |
| Scan | 2 | 33 | 1  | pRCA | 26.3 | 81.6  | 121.5 | 29.1  | 92.4  | 21.0  | 66.0  | 90.7  | 10.6  | 80.0  | 26.3  | 78.9  | 124.2 | 34.1  | 90.1  |
| Scan | 2 | 33 | 5  | LM   | 7.2  | 70.2  | 56.2  | 18.1  | 38.2  | 9.5   | 92.0  | 69.4  | 18.7  | 50.8  | 7.7   | 74.5  | 58.9  | 18.1  | 40.8  |
| Scan | 2 | 33 | 6  | pLAD | 25.3 | 140.9 | 179.4 | 63.2  | 116.2 | 19.1  | 99.6  | 150.5 | 60.8  | 89.6  | 23.6  | 130.7 | 174.3 | 63.7  | 110.7 |
| Scan | 2 | 33 | 7  | mLAD | 28.3 | 105.2 | 141.5 | 49.4  | 92.1  | 33.0  | 128.5 | 161.3 | 51.7  | 109.5 | 30.3  | 114.9 | 147.9 | 50.5  | 97.5  |
| Scan | 2 | 33 | 8  | dLAD | 98.6 | 242.2 | 159.5 | 37.7  | 121.8 | 109.1 | 251.8 | 164.8 | 38.4  | 126.4 | 102.7 | 244.5 | 160.5 | 36.3  | 124.3 |
| Scan | 2 | 33 | 11 | pLCX | 19.0 | 126.8 | 75.2  | 0.2   | 75.1  | 20.5  | 144.3 | 85.5  | 3.5   | 82.0  | 19.3  | 130.8 | 77.7  | 0.5   | 77.3  |
| Scan | 2 | 33 | 12 | OM1  | 59.6 | 202.8 | 118.3 | 3.0   | 115.3 | 58.6  | 196.0 | 109.3 | 0.0   | 109.3 | 58.6  | 196.0 | 109.3 | 0.0   | 109.3 |
| Scan | 2 | 34 | 1  | pRCA | 31.3 | 331.5 | 205.6 | 67.6  | 138.1 | 30.5  | 317.1 | 196.5 | 62.4  | 134.1 | 30.5  | 317.1 | 196.5 | 64.2  | 132.3 |
| Scan | 2 | 34 | 2  | mRCA | 34.9 | 272.7 | 151.7 | 22.3  | 129.4 | 34.5  | 270.1 | 150.2 | 21.9  | 128.3 | 34.5  | 270.1 | 150.2 | 22.3  | 127.9 |
| Scan | 2 | 34 | 3  | dRCA | 33.8 | 187.2 | 200.3 | 90.4  | 109.9 | 34.5  | 191.2 | 205.0 | 92.2  | 112.8 | 34.5  | 191.2 | 205.0 | 92.0  | 113.0 |
| Scan | 2 | 34 | 11 | pLCX | 15.8 | 147.7 | 108.0 | 46.5  | 61.5  | 17.7  | 161.4 | 126.1 | 57.1  | 69.0  | 16.7  | 152.0 | 110.6 | 45.8  | 64.8  |
| Scan | 2 | 34 | 13 | LCX  | 54.1 | 207.0 | 90.9  | 0.0   | 90.9  | 54.5  | 204.9 | 89.6  | 0.0   | 89.6  | 54.5  | 204.9 | 89.6  | 0.0   | 89.6  |

|      |   |    |    |      |       |       |       |       |       |       |       |       |       |       |       |       |       |       |       |
|------|---|----|----|------|-------|-------|-------|-------|-------|-------|-------|-------|-------|-------|-------|-------|-------|-------|-------|
| Scan | 2 | 34 | 5  | LM   | 18.2  | 251.2 | 90.5  | 15.8  | 74.7  | 20.0  | 273.8 | 113.0 | 28.9  | 84.1  | 20.0  | 273.8 | 113.0 | 28.9  | 84.1  |
| Scan | 2 | 34 | 6  | pLAD | 24.9  | 151.7 | 191.5 | 116.1 | 75.4  | 25.5  | 154.5 | 184.2 | 108.4 | 75.8  | 25.5  | 154.5 | 184.2 | 108.4 | 75.8  |
| Scan | 2 | 34 | 7  | mLAD | 31.7  | 110.9 | 81.1  | 22.4  | 58.6  | 30.0  | 100.0 | 72.0  | 17.0  | 55.0  | 30.0  | 100.0 | 72.0  | 17.0  | 55.0  |
| Scan | 2 | 34 | 8  | dLAD | 38.6  | 118.5 | 43.0  | 0.0   | 43.0  | 38.5  | 118.3 | 42.9  | 0.0   | 42.9  | 38.5  | 118.3 | 42.9  | 0.0   | 42.9  |
| Scan | 2 | 35 | 5  | LM   | 7.0   | 103.8 | 32.1  | 0.0   | 32.1  | 7.0   | 103.8 | 32.1  | 0.0   | 32.1  | 7.0   | 103.8 | 32.1  | 0.0   | 32.1  |
| Scan | 2 | 35 | 6  | pLAD | 15.7  | 106.2 | 66.1  | 4.5   | 61.6  | 11.7  | 85.5  | 48.3  | 0.6   | 47.7  | 15.7  | 106.1 | 66.0  | 4.5   | 61.5  |
| Scan | 2 | 35 | 7  | mLAD | 21.0  | 40.1  | 178.4 | 132.8 | 45.5  | 25.0  | 60.8  | 196.2 | 135.3 | 60.9  | 21.0  | 40.2  | 178.5 | 132.9 | 45.6  |
| Scan | 2 | 35 | 8  | dLAD | 99.5  | 279.4 | 137.1 | 1.2   | 135.9 | 99.5  | 279.4 | 137.1 | 1.4   | 135.7 | 99.5  | 279.4 | 137.1 | 1.2   | 135.9 |
| Scan | 2 | 35 | 11 | pLCX | 10.6  | 56.6  | 34.9  | 1.7   | 33.2  | 11.4  | 60.2  | 38.1  | 2.1   | 36.0  | 10.6  | 56.9  | 35.1  | 1.6   | 33.5  |
| Scan | 2 | 35 | 12 | OM1  | 68.7  | 232.6 | 145.0 | 17.0  | 128.0 | 73.8  | 238.6 | 160.0 | 16.7  | 143.3 | 68.6  | 224.6 | 152.4 | 16.8  | 135.6 |
| Scan | 2 | 35 | 1  | pRCA | 37.3  | 172.3 | 151.4 | 36.5  | 114.9 | 34.5  | 162.8 | 149.5 | 36.6  | 112.9 | 37.3  | 178.0 | 154.2 | 36.6  | 117.6 |
| Scan | 2 | 35 | 2  | mRCA | 35.3  | 162.1 | 49.7  | 0.0   | 49.7  | 36.5  | 169.9 | 52.0  | 0.0   | 52.0  | 35.7  | 163.6 | 50.4  | 0.0   | 50.4  |
| Scan | 2 | 35 | 3  | dRCA | 47.9  | 166.9 | 64.3  | 0.0   | 64.3  | 35.0  | 127.3 | 51.2  | 0.0   | 51.2  | 48.0  | 167.3 | 64.4  | 0.0   | 64.4  |
| Scan | 2 | 36 | 1  | pRCA | 45.0  | 327.0 | 159.9 | 21.8  | 138.1 | 47.5  | 344.8 | 165.1 | 21.8  | 143.3 | 45.9  | 332.8 | 161.6 | 21.8  | 139.8 |
| Scan | 2 | 36 | 2  | mRCA | 46.7  | 279.8 | 92.9  | 0.0   | 92.9  | 47.5  | 276.6 | 93.2  | 0.0   | 93.2  | 45.9  | 274.1 | 91.2  | 0.0   | 91.2  |
| Scan | 2 | 36 | 3  | dRCA | 42.3  | 171.1 | 63.2  | 0.0   | 63.2  | 48.0  | 190.8 | 73.4  | 1.2   | 72.3  | 46.4  | 184.5 | 71.1  | 1.2   | 69.9  |
| Scan | 2 | 36 | 5  | LM   | 6.5   | 88.6  | 40.7  | 0.0   | 40.7  | 6.5   | 88.6  | 40.7  | 0.0   | 40.7  | 6.5   | 88.6  | 40.7  | 0.0   | 40.7  |
| Scan | 2 | 36 | 6  | pLAD | 17.6  | 105.8 | 104.8 | 34.5  | 70.4  | 16.0  | 94.8  | 80.3  | 20.7  | 59.6  | 17.6  | 105.8 | 104.8 | 34.0  | 70.9  |
| Scan | 2 | 36 | 7  | mLAD | 28.9  | 138.6 | 137.2 | 29.0  | 108.2 | 30.5  | 149.6 | 161.8 | 41.9  | 119.8 | 28.9  | 138.6 | 137.2 | 28.6  | 108.6 |
| Scan | 2 | 36 | 8  | dLAD | 93.1  | 324.9 | 140.8 | 0.0   | 140.8 | 84.5  | 308.5 | 130.2 | 0.0   | 130.2 | 94.0  | 326.3 | 141.9 | 0.0   | 141.9 |
| Scan | 2 | 36 | 11 | pLCX | 11.6  | 56.2  | 76.4  | 17.7  | 58.7  | 11.1  | 55.3  | 70.9  | 14.1  | 56.8  | 11.1  | 55.3  | 70.9  | 14.0  | 56.8  |
| Scan | 2 | 36 | 13 | LCX  | 63.3  | 210.3 | 108.0 | 7.0   | 101.0 | 53.4  | 188.2 | 103.0 | 10.8  | 92.2  | 54.8  | 191.7 | 105.2 | 10.7  | 94.4  |
| Scan | 2 | 37 | 1  | pRCA | 31.4  | 182.4 | 107.1 | 17.3  | 89.8  | 35.5  | 185.6 | 105.0 | 5.9   | 99.1  | 33.1  | 190.7 | 110.6 | 17.3  | 93.3  |
| Scan | 2 | 37 | 2  | mRCA | 42.3  | 172.4 | 93.2  | 0.0   | 93.2  | 37.0  | 146.3 | 80.1  | 0.0   | 80.1  | 40.7  | 164.1 | 89.6  | 0.0   | 89.6  |
| Scan | 2 | 37 | 3  | dRCA | 67.4  | 207.5 | 99.5  | 0.3   | 99.3  | 71.8  | 215.2 | 104.4 | 0.1   | 104.3 | 65.3  | 203.9 | 96.5  | 0.3   | 96.2  |
| Scan | 2 | 37 | 11 | pLCX | 38.9  | 165.4 | 107.4 | 8.7   | 98.6  | 38.5  | 162.7 | 107.3 | 8.7   | 98.6  | 38.5  | 162.7 | 107.3 | 8.7   | 98.6  |
| Scan | 2 | 37 | 13 | LCX  | 39.0  | 115.4 | 49.3  | 0.0   | 49.3  | 45.0  | 131.2 | 57.6  | 0.0   | 57.6  | 45.0  | 131.2 | 57.6  | 0.0   | 57.6  |
| Scan | 2 | 37 | 5  | LM   | 15.8  | 151.4 | 62.8  | 5.2   | 57.6  | 13.2  | 153.3 | 53.1  | 6.1   | 47.0  | 15.8  | 151.4 | 62.8  | 5.2   | 57.6  |
| Scan | 2 | 37 | 6  | pLAD | 34.0  | 172.9 | 91.4  | 4.3   | 87.1  | 34.0  | 175.6 | 97.9  | 4.9   | 93.0  | 34.0  | 172.9 | 91.4  | 4.4   | 87.0  |
| Scan | 2 | 37 | 7  | mLAD | 27.1  | 99.7  | 44.5  | 3.7   | 40.8  | 23.2  | 83.4  | 41.3  | 3.7   | 37.5  | 27.1  | 99.7  | 44.5  | 3.7   | 40.8  |
| Scan | 2 | 37 | 8  | dLAD | 83.3  | 204.3 | 109.2 | 2.0   | 107.2 | 90.3  | 232.6 | 138.5 | 2.8   | 135.8 | 83.3  | 204.3 | 130.0 | 2.8   | 127.2 |
| Scan | 2 | 38 | 11 | pLCX | 5.3   | 44.7  | 20.4  | 5.8   | 14.6  | 5.3   | 44.7  | 20.4  | 5.6   | 14.8  | 5.3   | 44.7  | 20.4  | 5.6   | 14.8  |
| Scan | 2 | 38 | 13 | LCX  | 102.5 | 452.5 | 174.3 | 16.4  | 157.9 | 102.5 | 445.0 | 181.8 | 18.4  | 163.4 | 102.5 | 445.0 | 181.8 | 18.4  | 163.4 |
| Scan | 2 | 38 | 1  | pRCA | 44.0  | 221.7 | 83.5  | 12.0  | 71.5  | 44.0  | 221.7 | 83.5  | 10.7  | 72.9  | 44.0  | 221.7 | 83.5  | 12.0  | 71.5  |
| Scan | 2 | 38 | 2  | mRCA | 39.5  | 159.5 | 42.4  | 0.0   | 42.4  | 39.5  | 159.5 | 42.4  | 0.0   | 42.4  | 39.5  | 159.5 | 42.4  | 0.0   | 42.4  |
| Scan | 2 | 38 | 3  | dRCA | 33.5  | 103.3 | 38.6  | 0.0   | 38.6  | 33.5  | 103.1 | 38.8  | 0.1   | 38.8  | 33.5  | 103.1 | 38.8  | 0.0   | 38.8  |

|        |   |    |    |      |      |       |       |      |       |      |       |       |      |       |      |       |       |      |       |
|--------|---|----|----|------|------|-------|-------|------|-------|------|-------|-------|------|-------|------|-------|-------|------|-------|
| Scan   | 2 | 39 | 11 | pLCX | 11.6 | 67.5  | 18.7  | 0.8  | 17.9  | 11.6 | 67.5  | 18.7  | 0.9  | 17.8  | 11.6 | 67.5  | 18.7  | 0.8  | 17.9  |
| Scan   | 2 | 39 | 13 | LCX  | 22.5 | 70.5  | 34.4  | 0.6  | 33.8  | 23.7 | 74.8  | 35.6  | 0.7  | 34.9  | 27.1 | 84.7  | 38.2  | 0.7  | 37.5  |
| Scan   | 2 | 39 | 5  | LM   | 5.2  | 85.7  | 52.3  | 8.6  | 43.7  | 4.0  | 64.5  | 37.6  | 8.0  | 29.6  | 4.0  | 64.5  | 37.6  | 8.0  | 29.6  |
| Scan   | 2 | 39 | 6  | pLAD | 3.2  | 41.5  | 22.0  | 0.6  | 21.5  | 5.9  | 65.6  | 34.4  | 0.8  | 33.6  | 4.2  | 49.9  | 26.6  | 0.4  | 26.2  |
| Scan   | 2 | 39 | 7  | mLAD | 53.5 | 339.5 | 240.1 | 71.5 | 168.6 | 54.6 | 327.1 | 233.4 | 71.2 | 162.2 | 56.3 | 342.8 | 241.2 | 71.7 | 169.5 |
| Scan   | 2 | 39 | 8  | dLAD | 31.9 | 81.7  | 51.8  | 4.2  | 47.7  | 22.0 | 58.8  | 33.8  | 0.6  | 33.2  | 22.0 | 58.8  | 33.8  | 0.6  | 33.2  |
| Scan   | 2 | 39 | 1  | pRCA | 22.5 | 244.0 | 95.7  | 9.8  | 85.9  | 21.0 | 230.6 | 91.4  | 10.0 | 81.4  | 21.0 | 230.6 | 91.4  | 9.8  | 81.6  |
| Scan   | 2 | 39 | 2  | mRCA | 56.5 | 538.4 | 113.4 | 0.0  | 113.4 | 64.3 | 606.1 | 129.2 | 0.0  | 129.2 | 64.3 | 606.1 | 129.2 | 0.0  | 129.2 |
| Scan   | 2 | 39 | 3  | dRCA | 57.3 | 374.8 | 100.9 | 2.7  | 98.2  | 48.5 | 315.2 | 84.0  | 2.7  | 81.3  | 48.5 | 315.2 | 84.0  | 2.7  | 81.3  |
| Scan   | 2 | 40 | 1  | pRCA | 35.5 | 235.5 | 174.4 | 1.6  | 172.8 | 37.8 | 247.2 | 181.9 | 1.6  | 180.3 | 35.5 | 235.5 | 174.4 | 1.6  | 172.8 |
| Scan   | 2 | 40 | 2  | mRCA | 41.8 | 216.4 | 110.9 | 0.0  | 110.9 | 39.6 | 204.8 | 103.4 | 0.0  | 103.4 | 41.8 | 216.4 | 110.9 | 0.0  | 110.9 |
| Scan   | 2 | 40 | 3  | dRCA | 41.0 | 137.0 | 70.3  | 0.0  | 70.3  | 41.0 | 137.0 | 70.3  | 0.0  | 70.3  | 41.0 | 137.0 | 70.3  | 0.0  | 70.3  |
| Scan   | 2 | 40 | 5  | LM   | 12.2 | 144.1 | 63.5  | 2.6  | 60.9  | 13.0 | 151.7 | 69.1  | 4.1  | 65.1  | 13.0 | 151.7 | 69.1  | 4.1  | 65.1  |
| Scan   | 2 | 40 | 6  | pLAD | 21.3 | 197.0 | 121.2 | 3.1  | 118.1 | 22.5 | 205.7 | 122.7 | 1.7  | 121.0 | 22.5 | 205.7 | 122.7 | 1.7  | 121.0 |
| Scan   | 2 | 40 | 7  | mLAD | 31.3 | 152.0 | 69.3  | 0.0  | 69.3  | 25.1 | 115.9 | 57.5  | 0.0  | 57.5  | 25.1 | 115.9 | 57.5  | 0.0  | 57.5  |
| Scan   | 2 | 40 | 8  | dLAD | 52.8 | 163.1 | 81.8  | 0.0  | 81.8  | 69.0 | 204.0 | 102.6 | 0.4  | 102.3 | 57.0 | 182.9 | 86.5  | 0.0  | 86.5  |
| Scan   | 2 | 40 | 11 | pLCX | 5.0  | 46.2  | 26.0  | 4.5  | 21.4  | 3.6  | 29.9  | 16.3  | 1.5  | 14.8  | 3.6  | 29.9  | 16.3  | 1.5  | 14.8  |
| Scan   | 2 | 40 | 13 | LCX  | 37.2 | 175.7 | 91.2  | 1.2  | 89.9  | 41.9 | 193.6 | 99.0  | 1.6  | 97.4  | 41.9 | 193.6 | 99.0  | 1.5  | 97.6  |
| Rescan | 1 | 1  | 11 | pLCX | 14.0 | 92.9  | 40.7  | 0.0  | 40.7  | 13.0 | 84.5  | 38.2  | 0.0  | 38.2  | NA   | NA    | NA    | NA   | NA    |
| Rescan | 1 | 1  | 13 | LCX  | 80.1 | 452.8 | 188.6 | 0.2  | 188.5 | 91.7 | 489.1 | 211.9 | 0.2  | 211.7 | NA   | NA    | NA    | NA   | NA    |
| Rescan | 1 | 1  | 5  | LM   | 7.9  | 111.6 | 34.2  | 0.8  | 33.4  | 6.0  | 77.0  | 26.8  | 0.1  | 26.7  | NA   | NA    | NA    | NA   | NA    |
| Rescan | 1 | 1  | 6  | pLAD | 18.3 | 113.1 | 73.0  | 11.8 | 61.2  | 19.0 | 117.9 | 71.6  | 9.4  | 62.2  | NA   | NA    | NA    | NA   | NA    |
| Rescan | 1 | 1  | 7  | mLAD | 29.6 | 124.8 | 77.2  | 17.4 | 59.8  | 30.0 | 126.8 | 81.1  | 19.8 | 61.3  | NA   | NA    | NA    | NA   | NA    |
| Rescan | 1 | 1  | 8  | dLAD | 86.5 | 288.8 | 134.0 | 0.8  | 133.3 | 86.5 | 288.8 | 134.0 | 0.7  | 133.3 | NA   | NA    | NA    | NA   | NA    |
| Rescan | 1 | 2  | 5  | LM   | 5.7  | 62.6  | 32.7  | 1.5  | 31.2  | 6.8  | 93.6  | 41.9  | 0.0  | 41.9  | NA   | NA    | NA    | NA   | NA    |
| Rescan | 1 | 2  | 6  | pLAD | 16.8 | 108.9 | 41.8  | 0.9  | 41.0  | 20.7 | 121.4 | 61.8  | 0.0  | 61.8  | NA   | NA    | NA    | NA   | NA    |
| Rescan | 1 | 2  | 7  | mLAD | 33.3 | 148.4 | 115.0 | 19.9 | 95.1  | 34.7 | 155.7 | 113.1 | 15.3 | 97.9  | NA   | NA    | NA    | NA   | NA    |
| Rescan | 1 | 2  | 8  | dLAD | 35.1 | 141.2 | 58.0  | 0.1  | 57.9  | 38.2 | 136.1 | 55.7  | 0.1  | 55.6  | NA   | NA    | NA    | NA   | NA    |
| Rescan | 1 | 2  | 11 | pLCX | 11.3 | 66.7  | 32.4  | 0.0  | 32.4  | 13.0 | 73.3  | 37.3  | 0.0  | 37.3  | NA   | NA    | NA    | NA   | NA    |
| Rescan | 1 | 2  | 13 | LCX  | 29.3 | 126.4 | 58.0  | 0.0  | 58.0  | 29.3 | 126.4 | 58.0  | 0.0  | 58.0  | NA   | NA    | NA    | NA   | NA    |
| Rescan | 1 | 2  | 1  | pRCA | 39.8 | 404.6 | 204.8 | 0.1  | 204.7 | 46.0 | 509.7 | 235.1 | 0.4  | 234.8 | NA   | NA    | NA    | NA   | NA    |
| Rescan | 1 | 2  | 2  | mRCA | 47.0 | 419.6 | 142.9 | 0.0  | 142.9 | 46.0 | 384.5 | 156.8 | 0.0  | 156.8 | NA   | NA    | NA    | NA   | NA    |
| Rescan | 1 | 2  | 3  | dRCA | 46.0 | 331.5 | 119.9 | 0.9  | 119.0 | 46.5 | 329.8 | 122.8 | 1.1  | 121.7 | NA   | NA    | NA    | NA   | NA    |
| Rescan | 1 | 3  | 11 | pLCX | 12.5 | 89.5  | 32.5  | 0.8  | 31.7  | 12.5 | 89.5  | 32.5  | 0.8  | 31.7  | NA   | NA    | NA    | NA   | NA    |
| Rescan | 1 | 3  | 13 | LCX  | 52.9 | 232.8 | 81.2  | 0.1  | 81.1  | 48.5 | 213.9 | 75.8  | 0.1  | 75.8  | NA   | NA    | NA    | NA   | NA    |
| Rescan | 1 | 3  | 5  | LM   | 10.9 | 138.6 | 38.8  | 0.2  | 38.5  | 10.5 | 128.4 | 36.2  | 0.1  | 36.1  | NA   | NA    | NA    | NA   | NA    |

|        |   |   |    |      |      |       |       |      |       |      |       |       |      |       |    |    |    |    |    |
|--------|---|---|----|------|------|-------|-------|------|-------|------|-------|-------|------|-------|----|----|----|----|----|
| Rescan | 1 | 3 | 6  | pLAD | 7.5  | 54.0  | 22.4  | 0.3  | 22.1  | 7.5  | 54.0  | 22.4  | 0.3  | 22.1  | NA | NA | NA | NA | NA |
| Rescan | 1 | 3 | 7  | mLAD | 30.0 | 167.3 | 57.7  | 0.0  | 57.7  | 30.0 | 167.3 | 57.7  | 0.0  | 57.7  | NA | NA | NA | NA | NA |
| Rescan | 1 | 3 | 8  | dLAD | 10.9 | 38.7  | 18.0  | 0.0  | 18.0  | 9.3  | 33.3  | 15.0  | 0.0  | 15.0  | NA | NA | NA | NA | NA |
| Rescan | 1 | 3 | 1  | pRCA | 31.6 | 178.9 | 79.3  | 0.1  | 79.2  | 33.0 | 195.2 | 89.4  | 1.0  | 88.3  | NA | NA | NA | NA | NA |
| Rescan | 1 | 3 | 2  | mRCA | 31.7 | 142.6 | 55.7  | 0.0  | 55.7  | 35.0 | 155.1 | 62.5  | 0.0  | 62.5  | NA | NA | NA | NA | NA |
| Rescan | 1 | 4 | 11 | pLCX | 11.2 | 48.2  | 28.8  | 1.5  | 27.3  | 13.5 | 57.9  | 35.6  | 1.5  | 34.2  | NA | NA | NA | NA | NA |
| Rescan | 1 | 4 | 13 | LCX  | 35.5 | 121.9 | 83.0  | 22.5 | 60.5  | 35.5 | 122.2 | 82.7  | 22.1 | 60.6  | NA | NA | NA | NA | NA |
| Rescan | 1 | 4 | 5  | LM   | 18.5 | 105.5 | 108.7 | 31.4 | 77.3  | 18.5 | 105.5 | 108.7 | 31.6 | 77.1  | NA | NA | NA | NA | NA |
| Rescan | 1 | 4 | 6  | pLAD | 23.0 | 111.4 | 175.0 | 80.3 | 94.8  | 23.0 | 111.4 | 175.0 | 71.7 | 103.3 | NA | NA | NA | NA | NA |
| Rescan | 1 | 4 | 7  | mLAD | 42.2 | 128.9 | 135.8 | 63.1 | 72.8  | 42.2 | 128.9 | 138.7 | 41.4 | 97.3  | NA | NA | NA | NA | NA |
| Rescan | 1 | 4 | 1  | pRCA | 40.5 | 385.7 | 299.6 | 81.9 | 217.8 | 40.5 | 354.2 | 331.1 | 80.5 | 250.6 | NA | NA | NA | NA | NA |
| Rescan | 1 | 4 | 2  | mRCA | 41.0 | 270.6 | 226.5 | 42.1 | 184.4 | 41.0 | 264.7 | 232.4 | 41.7 | 190.8 | NA | NA | NA | NA | NA |
| Rescan | 1 | 4 | 3  | dRCA | 40.5 | 229.0 | 147.0 | 40.6 | 106.4 | 40.5 | 229.0 | 147.0 | 42.9 | 104.1 | NA | NA | NA | NA | NA |
| Rescan | 1 | 5 | 11 | pLCX | 26.0 | 96.4  | 50.5  | 0.0  | 50.4  | 26.0 | 93.3  | 53.6  | 0.0  | 53.6  | NA | NA | NA | NA | NA |
| Rescan | 1 | 5 | 12 | OM1  | 66.5 | 171.7 | 98.1  | 2.4  | 95.7  | 66.5 | 171.7 | 98.1  | 2.4  | 95.7  | NA | NA | NA | NA | NA |
| Rescan | 1 | 5 | 5  | LM   | 18.5 | 69.6  | 43.5  | 1.3  | 42.1  | 13.4 | 49.9  | 32.1  | 0.8  | 31.2  | NA | NA | NA | NA | NA |
| Rescan | 1 | 5 | 6  | pLAD | 5.0  | 17.7  | 11.4  | 0.2  | 11.2  | 10.1 | 37.4  | 22.8  | 0.7  | 22.1  | NA | NA | NA | NA | NA |
| Rescan | 1 | 5 | 7  | mLAD | 30.9 | 99.4  | 52.4  | 0.2  | 52.2  | 30.9 | 97.7  | 54.0  | 0.2  | 53.8  | NA | NA | NA | NA | NA |
| Rescan | 1 | 5 | 8  | dLAD | 15.2 | 37.6  | 15.9  | 0.0  | 15.9  | 15.2 | 37.6  | 16.3  | 0.0  | 16.3  | NA | NA | NA | NA | NA |
| Rescan | 1 | 5 | 1  | pRCA | 31.0 | 153.1 | 82.5  | 2.2  | 80.4  | 31.0 | 144.7 | 90.9  | 2.0  | 88.9  | NA | NA | NA | NA | NA |
| Rescan | 1 | 5 | 2  | mRCA | 32.5 | 125.7 | 75.7  | 0.1  | 75.6  | 32.5 | 124.8 | 76.6  | 0.1  | 76.5  | NA | NA | NA | NA | NA |
| Rescan | 1 | 5 | 3  | dRCA | 32.5 | 102.0 | 57.2  | 4.4  | 52.7  | 32.5 | 102.0 | 57.2  | 4.6  | 52.6  | NA | NA | NA | NA | NA |
| Rescan | 1 | 6 | 11 | pLCX | 13.1 | 78.9  | 67.1  | 4.9  | 62.2  | 14.5 | 86.2  | 72.4  | 13.1 | 59.3  | NA | NA | NA | NA | NA |
| Rescan | 1 | 6 | 13 | LCX  | 12.0 | 53.8  | 20.8  | 0.1  | 20.7  | 12.5 | 54.8  | 18.0  | 0.0  | 18.0  | NA | NA | NA | NA | NA |
| Rescan | 1 | 6 | 5  | LM   | 20.0 | 192.0 | 108.1 | 20.1 | 88.0  | 20.0 | 192.0 | 108.1 | 20.2 | 87.9  | NA | NA | NA | NA | NA |
| Rescan | 1 | 6 | 6  | pLAD | 19.5 | 147.9 | 160.9 | 91.4 | 69.5  | 21.5 | 166.8 | 164.1 | 91.6 | 72.5  | NA | NA | NA | NA | NA |
| Rescan | 1 | 6 | 7  | mLAD | 17.6 | 114.3 | 83.2  | 43.9 | 39.3  | 13.7 | 89.7  | 60.2  | 28.2 | 32.0  | NA | NA | NA | NA | NA |
| Rescan | 1 | 6 | 8  | dLAD | 57.2 | 207.7 | 101.2 | 23.6 | 77.6  | 60.1 | 216.2 | 122.0 | 39.1 | 82.9  | NA | NA | NA | NA | NA |
| Rescan | 1 | 6 | 1  | pRCA | 32.4 | 460.4 | 150.9 | 26.7 | 124.2 | 30.5 | 434.0 | 140.5 | 24.4 | 116.1 | NA | NA | NA | NA | NA |
| Rescan | 1 | 6 | 2  | mRCA | 36.5 | 480.3 | 163.2 | 35.0 | 128.2 | 35.0 | 464.8 | 156.5 | 34.5 | 122.0 | NA | NA | NA | NA | NA |
| Rescan | 1 | 6 | 3  | dRCA | 32.0 | 309.1 | 114.9 | 0.0  | 114.9 | 33.5 | 324.7 | 121.6 | 0.0  | 121.6 | NA | NA | NA | NA | NA |
| Rescan | 1 | 7 | 3  | dRCA | 35.5 | 367.4 | 181.2 | 24.7 | 156.5 | 36.7 | 373.5 | 168.5 | 17.8 | 150.7 | NA | NA | NA | NA | NA |
| Rescan | 1 | 7 | 13 | LCX  | 33.0 | 109.8 | 36.9  | 0.1  | 36.8  | 33.0 | 108.3 | 38.3  | 0.1  | 38.3  | NA | NA | NA | NA | NA |
| Rescan | 1 | 7 | 6  | pLAD | 14.0 | 102.6 | 75.5  | 2.1  | 73.5  | 14.0 | 102.6 | 75.5  | 2.1  | 73.5  | NA | NA | NA | NA | NA |
| Rescan | 1 | 7 | 7  | mLAD | 50.4 | 233.7 | 98.6  | 0.3  | 98.3  | 31.0 | 175.3 | 64.4  | 0.0  | 64.4  | NA | NA | NA | NA | NA |
| Rescan | 1 | 7 | 8  | dLAD | 50.1 | 155.8 | 80.6  | 0.0  | 80.5  | 69.5 | 214.2 | 114.7 | 0.3  | 114.5 | NA | NA | NA | NA | NA |

|        |   |    |    |      |      |       |       |       |       |      |       |       |       |       |    |    |    |    |    |
|--------|---|----|----|------|------|-------|-------|-------|-------|------|-------|-------|-------|-------|----|----|----|----|----|
| Rescan | 1 | 8  | 5  | LM   | 9.5  | 96.8  | 62.5  | 2.5   | 60.0  | 9.5  | 96.8  | 62.5  | 2.5   | 60.0  | NA | NA | NA | NA | NA |
| Rescan | 1 | 8  | 6  | pLAD | 23.5 | 138.8 | 143.0 | 51.5  | 91.6  | 23.5 | 126.1 | 155.7 | 58.3  | 97.4  | NA | NA | NA | NA | NA |
| Rescan | 1 | 8  | 7  | mLAD | 30.5 | 144.6 | 54.5  | 5.7   | 48.8  | 30.5 | 141.5 | 57.6  | 5.9   | 51.7  | NA | NA | NA | NA | NA |
| Rescan | 1 | 8  | 8  | dLAD | 39.5 | 120.0 | 39.7  | 0.0   | 39.7  | 39.5 | 120.0 | 39.7  | 0.0   | 39.7  | NA | NA | NA | NA | NA |
| Rescan | 1 | 8  | 11 | pLCX | 13.0 | 62.2  | 22.9  | 2.3   | 20.6  | 13.0 | 57.3  | 29.0  | 3.5   | 25.5  | NA | NA | NA | NA | NA |
| Rescan | 1 | 8  | 13 | LCX  | 70.0 | 230.9 | 90.2  | 0.0   | 90.2  | 70.0 | 230.9 | 90.2  | 0.0   | 90.2  | NA | NA | NA | NA | NA |
| Rescan | 1 | 8  | 1  | pRCA | 41.4 | 433.6 | 213.8 | 34.1  | 179.7 | 41.4 | 421.8 | 225.6 | 34.0  | 191.6 | NA | NA | NA | NA | NA |
| Rescan | 1 | 8  | 2  | mRCA | 26.8 | 185.0 | 107.6 | 9.6   | 98.1  | 26.8 | 185.0 | 107.6 | 9.8   | 97.8  | NA | NA | NA | NA | NA |
| Rescan | 1 | 8  | 3  | dRCA | 32.7 | 165.9 | 46.0  | 0.0   | 46.0  | 32.7 | 165.9 | 46.0  | 0.0   | 46.0  | NA | NA | NA | NA | NA |
| Rescan | 1 | 9  | 11 | pLCX | 45.2 | 283.9 | 191.5 | 8.7   | 182.9 | 39.7 | 257.9 | 174.7 | 8.1   | 166.6 | NA | NA | NA | NA | NA |
| Rescan | 1 | 9  | 13 | LCX  | 22.0 | 62.7  | 35.0  | 0.4   | 34.7  | 27.5 | 88.7  | 51.9  | 1.0   | 50.9  | NA | NA | NA | NA | NA |
| Rescan | 1 | 9  | 5  | LM   | 15.5 | 172.7 | 81.5  | 3.7   | 77.9  | 15.5 | 172.7 | 81.5  | 3.7   | 77.9  | NA | NA | NA | NA | NA |
| Rescan | 1 | 9  | 6  | pLAD | 11.0 | 67.2  | 43.4  | 1.2   | 42.2  | 11.0 | 67.2  | 43.4  | 1.2   | 42.2  | NA | NA | NA | NA | NA |
| Rescan | 1 | 9  | 7  | mLAD | 16.0 | 112.3 | 58.8  | 1.8   | 56.9  | 16.0 | 112.3 | 58.8  | 1.8   | 56.9  | NA | NA | NA | NA | NA |
| Rescan | 1 | 9  | 2  | mRCA | 32.0 | 125.9 | 53.8  | 0.0   | 53.8  | 32.0 | 125.9 | 53.8  | 0.0   | 53.8  | NA | NA | NA | NA | NA |
| Rescan | 1 | 9  | 3  | dRCA | 32.5 | 94.2  | 45.3  | 0.0   | 45.3  | 32.5 | 94.2  | 45.3  | 0.0   | 45.3  | NA | NA | NA | NA | NA |
| Rescan | 1 | 10 | 5  | LM   | 4.3  | 62.9  | 20.8  | 1.7   | 19.1  | 8.0  | 86.6  | 27.8  | 2.4   | 25.4  | NA | NA | NA | NA | NA |
| Rescan | 1 | 10 | 6  | pLAD | 11.1 | 69.5  | 36.0  | 0.3   | 35.6  | 11.5 | 72.3  | 37.0  | 0.4   | 36.6  | NA | NA | NA | NA | NA |
| Rescan | 1 | 10 | 7  | mLAD | 37.7 | 187.4 | 75.8  | 0.2   | 75.6  | 28.5 | 153.8 | 62.7  | 0.1   | 62.6  | NA | NA | NA | NA | NA |
| Rescan | 1 | 10 | 8  | dLAD | 38.8 | 95.8  | 51.7  | 0.0   | 51.7  | 42.0 | 116.5 | 57.3  | 0.0   | 57.3  | NA | NA | NA | NA | NA |
| Rescan | 1 | 10 | 11 | pLCX | 31.2 | 218.2 | 106.2 | 1.3   | 104.9 | 28.0 | 197.1 | 96.9  | 0.8   | 96.1  | NA | NA | NA | NA | NA |
| Rescan | 1 | 10 | 13 | LCX  | 60.5 | 306.7 | 138.0 | 0.1   | 137.9 | 60.5 | 306.7 | 138.0 | 0.3   | 137.8 | NA | NA | NA | NA | NA |
| Rescan | 1 | 10 | 1  | pRCA | 40.5 | 360.2 | 171.6 | 9.3   | 162.3 | 40.5 | 360.2 | 171.6 | 9.3   | 162.3 | NA | NA | NA | NA | NA |
| Rescan | 1 | 10 | 2  | mRCA | 41.0 | 200.3 | 99.5  | 0.0   | 99.5  | 41.0 | 200.3 | 99.5  | 0.0   | 99.5  | NA | NA | NA | NA | NA |
| Rescan | 1 | 11 | 11 | pLCX | 24.0 | 204.6 | 107.0 | 21.3  | 85.7  | 24.0 | 204.6 | 107.0 | 21.3  | 85.7  | NA | NA | NA | NA | NA |
| Rescan | 1 | 11 | 13 | LCX  | 60.0 | 240.4 | 112.6 | 3.5   | 109.1 | 60.0 | 243.0 | 115.4 | 3.6   | 111.8 | NA | NA | NA | NA | NA |
| Rescan | 1 | 11 | 5  | LM   | 15.0 | 255.3 | 55.7  | 0.0   | 55.7  | 15.0 | 255.3 | 55.7  | 0.0   | 55.7  | NA | NA | NA | NA | NA |
| Rescan | 1 | 11 | 6  | pLAD | 7.5  | 78.2  | 90.1  | 5.6   | 84.5  | 7.5  | 78.2  | 90.1  | 5.6   | 84.5  | NA | NA | NA | NA | NA |
| Rescan | 1 | 11 | 7  | mLAD | 29.5 | 175.2 | 96.0  | 12.9  | 83.1  | 29.5 | 175.2 | 96.4  | 12.9  | 83.5  | NA | NA | NA | NA | NA |
| Rescan | 1 | 11 | 8  | dLAD | 79.5 | 350.3 | 148.7 | 18.3  | 130.4 | 79.5 | 350.3 | 150.7 | 18.2  | 132.5 | NA | NA | NA | NA | NA |
| Rescan | 1 | 11 | 1  | pRCA | 37.5 | 551.8 | 160.3 | 6.4   | 153.9 | 37.5 | 539.4 | 172.6 | 6.3   | 166.4 | NA | NA | NA | NA | NA |
| Rescan | 1 | 11 | 2  | mRCA | 39.5 | 439.8 | 110.4 | 0.0   | 110.4 | 39.5 | 433.6 | 116.6 | 0.0   | 116.6 | NA | NA | NA | NA | NA |
| Rescan | 1 | 11 | 3  | dRCA | 33.3 | 264.4 | 98.9  | 15.9  | 83.0  | 33.3 | 264.4 | 98.9  | 15.8  | 83.1  | NA | NA | NA | NA | NA |
| Rescan | 1 | 12 | 11 | pLCX | 25.5 | 191.9 | 241.8 | 72.2  | 169.6 | 25.5 | 193.7 | 239.9 | 71.5  | 168.4 | NA | NA | NA | NA | NA |
| Rescan | 1 | 12 | 5  | LM   | 6.7  | 70.8  | 45.8  | 0.0   | 45.8  | 6.7  | 70.8  | 45.8  | 0.0   | 45.8  | NA | NA | NA | NA | NA |
| Rescan | 1 | 12 | 6  | pLAD | 21.8 | 139.4 | 299.9 | 137.6 | 162.3 | 21.8 | 133.0 | 306.3 | 138.9 | 167.4 | NA | NA | NA | NA | NA |

|        |   |    |    |      |      |       |       |       |       |      |       |       |       |       |    |    |    |    |    |
|--------|---|----|----|------|------|-------|-------|-------|-------|------|-------|-------|-------|-------|----|----|----|----|----|
| Rescan | 1 | 12 | 8  | dLAD | 28.1 | 76.6  | 36.4  | 0.0   | 36.4  | 28.1 | 76.6  | 42.2  | 0.0   | 42.2  | NA | NA | NA | NA | NA |
| Rescan | 1 | 12 | 1  | pRCA | 14.8 | 128.5 | 53.3  | 2.5   | 50.9  | 14.8 | 128.5 | 53.3  | 2.5   | 50.9  | NA | NA | NA | NA | NA |
| Rescan | 1 | 12 | 2  | mRCA | 32.5 | 214.0 | 159.5 | 39.7  | 119.8 | 32.5 | 214.0 | 159.5 | 39.7  | 119.8 | NA | NA | NA | NA | NA |
| Rescan | 1 | 12 | 3  | dRCA | 32.0 | 173.5 | 62.7  | 0.3   | 62.4  | 32.0 | 173.5 | 62.7  | 0.3   | 62.4  | NA | NA | NA | NA | NA |
| Rescan | 1 | 13 | 5  | LM   | 10.0 | 65.3  | 41.2  | 2.4   | 38.9  | 10.0 | 63.9  | 42.7  | 2.5   | 40.2  | NA | NA | NA | NA | NA |
| Rescan | 1 | 13 | 6  | pLAD | 23.0 | 207.8 | 100.3 | 15.3  | 85.0  | 23.0 | 208.5 | 99.5  | 15.8  | 83.8  | NA | NA | NA | NA | NA |
| Rescan | 1 | 13 | 7  | mLAD | 41.5 | 197.3 | 79.6  | 2.2   | 77.4  | 41.5 | 195.0 | 85.3  | 4.6   | 80.7  | NA | NA | NA | NA | NA |
| Rescan | 1 | 13 | 11 | pLCX | 13.5 | 68.4  | 27.8  | 0.1   | 27.7  | 13.5 | 67.9  | 28.3  | 0.1   | 28.3  | NA | NA | NA | NA | NA |
| Rescan | 1 | 13 | 13 | LCX  | 55.5 | 199.9 | 92.2  | 0.3   | 91.9  | 55.5 | 197.7 | 94.4  | 0.3   | 94.2  | NA | NA | NA | NA | NA |
| Rescan | 1 | 13 | 1  | pRCA | 35.0 | 278.4 | 108.9 | 1.1   | 107.9 | 35.0 | 278.4 | 108.9 | 1.1   | 107.9 | NA | NA | NA | NA | NA |
| Rescan | 1 | 13 | 2  | mRCA | 36.0 | 385.0 | 117.1 | 0.0   | 117.1 | 36.0 | 385.0 | 117.1 | 0.0   | 117.1 | NA | NA | NA | NA | NA |
| Rescan | 1 | 13 | 3  | dRCA | 35.0 | 218.3 | 59.7  | 0.0   | 59.7  | 35.0 | 218.3 | 59.7  | 0.0   | 59.7  | NA | NA | NA | NA | NA |
| Rescan | 1 | 14 | 1  | pRCA | 20.9 | 124.1 | 66.9  | 15.1  | 51.7  | 24.9 | 132.0 | 95.1  | 25.0  | 70.1  | NA | NA | NA | NA | NA |
| Rescan | 1 | 14 | 2  | mRCA | 55.3 | 187.7 | 158.2 | 62.8  | 95.4  | 36.5 | 139.3 | 166.4 | 77.4  | 89.1  | NA | NA | NA | NA | NA |
| Rescan | 1 | 14 | 3  | dRCA | 39.5 | 105.4 | 34.0  | 0.0   | 34.0  | 37.0 | 113.2 | 34.6  | 0.0   | 34.6  | NA | NA | NA | NA | NA |
| Rescan | 1 | 14 | 5  | LM   | 22.9 | 150.6 | 192.5 | 57.7  | 134.8 | 20.2 | 134.8 | 162.9 | 38.7  | 124.2 | NA | NA | NA | NA | NA |
| Rescan | 1 | 14 | 7  | mLAD | 34.5 | 115.9 | 176.5 | 67.7  | 108.8 | 38.0 | 132.9 | 190.0 | 68.1  | 121.9 | NA | NA | NA | NA | NA |
| Rescan | 1 | 14 | 8  | dLAD | 52.0 | 182.9 | 70.3  | 9.2   | 61.1  | 52.0 | 182.9 | 71.0  | 9.2   | 61.8  | NA | NA | NA | NA | NA |
| Rescan | 1 | 14 | 11 | pLCX | 39.7 | 194.2 | 169.3 | 37.8  | 131.6 | 39.7 | 195.7 | 167.7 | 37.5  | 130.3 | NA | NA | NA | NA | NA |
| Rescan | 1 | 14 | 13 | LCX  | 58.3 | 218.0 | 77.5  | 0.0   | 77.5  | 58.3 | 218.0 | 77.5  | 0.0   | 77.5  | NA | NA | NA | NA | NA |
| Rescan | 1 | 15 | 11 | pLCX | 14.5 | 67.3  | 100.5 | 45.0  | 55.6  | 14.5 | 57.3  | 110.5 | 48.8  | 61.7  | NA | NA | NA | NA | NA |
| Rescan | 1 | 15 | 13 | LCX  | 26.5 | 69.3  | 22.7  | 0.0   | 22.7  | 26.5 | 69.3  | 22.7  | 0.0   | 22.7  | NA | NA | NA | NA | NA |
| Rescan | 1 | 15 | 5  | LM   | 11.5 | 102.1 | 100.1 | 32.5  | 67.6  | 11.5 | 98.8  | 103.4 | 32.5  | 71.0  | NA | NA | NA | NA | NA |
| Rescan | 1 | 15 | 6  | pLAD | 23.0 | 96.6  | 281.8 | 103.2 | 178.5 | 23.0 | 96.6  | 281.8 | 102.3 | 179.5 | NA | NA | NA | NA | NA |
| Rescan | 1 | 15 | 7  | mLAD | 33.5 | 206.7 | 198.3 | 51.3  | 146.9 | 33.5 | 214.7 | 190.3 | 48.2  | 142.1 | NA | NA | NA | NA | NA |
| Rescan | 1 | 15 | 8  | dLAD | 37.4 | 146.1 | 64.8  | 16.1  | 48.8  | 57.0 | 196.8 | 86.1  | 20.0  | 66.0  | NA | NA | NA | NA | NA |
| Rescan | 1 | 15 | 1  | pRCA | 40.0 | 514.3 | 202.2 | 12.0  | 190.2 | 40.0 | 518.5 | 198.0 | 10.2  | 187.8 | NA | NA | NA | NA | NA |
| Rescan | 1 | 15 | 2  | mRCA | 41.5 | 429.2 | 171.5 | 15.2  | 156.2 | 41.5 | 426.2 | 174.5 | 15.2  | 159.3 | NA | NA | NA | NA | NA |
| Rescan | 1 | 15 | 3  | dRCA | 40.0 | 330.5 | 112.4 | 25.7  | 86.7  | 40.0 | 328.6 | 114.9 | 25.7  | 89.2  | NA | NA | NA | NA | NA |
| Rescan | 1 | 16 | 2  | mRCA | 40.5 | 285.2 | 355.9 | 120.2 | 235.7 | 40.5 | 285.2 | 355.9 | 119.5 | 236.4 | NA | NA | NA | NA | NA |
| Rescan | 1 | 16 | 3  | dRCA | 40.5 | 269.2 | 280.5 | 114.1 | 166.3 | 40.5 | 269.2 | 280.5 | 114.2 | 166.3 | NA | NA | NA | NA | NA |
| Rescan | 1 | 16 | 11 | pLCX | 13.5 | 40.3  | 92.2  | 37.8  | 54.3  | 13.5 | 40.3  | 92.2  | 37.8  | 54.3  | NA | NA | NA | NA | NA |
| Rescan | 1 | 16 | 13 | LCX  | 20.7 | 74.3  | 44.4  | 5.8   | 38.6  | 20.7 | 74.3  | 45.0  | 5.8   | 39.3  | NA | NA | NA | NA | NA |
| Rescan | 1 | 16 | 5  | LM   | 4.5  | 30.0  | 52.4  | 20.4  | 32.0  | 4.5  | 30.0  | 52.4  | 19.9  | 32.5  | NA | NA | NA | NA | NA |
| Rescan | 1 | 16 | 6  | pLAD | 23.5 | 173.0 | 142.5 | 45.2  | 97.3  | 23.5 | 172.4 | 143.1 | 44.0  | 99.1  | NA | NA | NA | NA | NA |

|        |   |    |    |      |      |       |       |       |       |      |       |       |       |       |    |    |    |    |    |
|--------|---|----|----|------|------|-------|-------|-------|-------|------|-------|-------|-------|-------|----|----|----|----|----|
| Rescan | 1 | 16 | 7  | mLAD | 44.0 | 206.2 | 111.7 | 18.8  | 92.9  | 44.0 | 205.4 | 117.1 | 18.5  | 98.5  | NA | NA | NA | NA | NA |
| Rescan | 1 | 16 | 8  | dLAD | 76.5 | 217.5 | 102.1 | 0.0   | 102.1 | 76.5 | 217.5 | 107.1 | 0.0   | 107.1 | NA | NA | NA | NA | NA |
| Rescan | 1 | 17 | 1  | pRCA | 34.2 | 305.0 | 362.3 | 164.8 | 197.5 | 32.0 | 320.7 | 328.7 | 152.3 | 176.3 | NA | NA | NA | NA | NA |
| Rescan | 1 | 17 | 2  | mRCA | 38.4 | 240.6 | 571.9 | 357.4 | 214.5 | 38.0 | 248.4 | 559.7 | 337.6 | 222.1 | NA | NA | NA | NA | NA |
| Rescan | 1 | 17 | 3  | dRCA | 38.0 | 202.0 | 489.8 | 298.8 | 191.1 | 37.7 | 190.3 | 477.4 | 287.7 | 189.8 | NA | NA | NA | NA | NA |
| Rescan | 1 | 17 | 5  | LM   | 7.1  | 88.0  | 67.6  | 7.7   | 59.9  | 9.0  | 111.8 | 89.4  | 8.4   | 81.0  | NA | NA | NA | NA | NA |
| Rescan | 1 | 17 | 6  | pLAD | 19.0 | 115.0 | 189.0 | 86.6  | 102.4 | 19.0 | 115.0 | 189.0 | 86.6  | 102.4 | NA | NA | NA | NA | NA |
| Rescan | 1 | 17 | 7  | mLAD | 26.0 | 86.1  | 486.6 | 374.3 | 112.3 | 27.0 | 90.0  | 504.1 | 390.0 | 114.1 | NA | NA | NA | NA | NA |
| Rescan | 1 | 17 | 8  | dLAD | 59.7 | 174.6 | 206.2 | 82.8  | 123.3 | 60.0 | 173.6 | 190.4 | 67.2  | 123.2 | NA | NA | NA | NA | NA |
| Rescan | 1 | 17 | 11 | pLCX | 32.0 | 203.1 | 393.9 | 212.2 | 181.7 | 32.0 | 203.1 | 393.9 | 212.2 | 181.7 | NA | NA | NA | NA | NA |
| Rescan | 1 | 17 | 13 | LCX  | 20.2 | 65.2  | 236.0 | 110.1 | 125.9 | 17.7 | 58.8  | 204.4 | 93.1  | 111.3 | NA | NA | NA | NA | NA |
| Rescan | 1 | 18 | 11 | pLCX | 12.6 | 94.6  | 64.3  | 1.2   | 63.1  | 14.0 | 111.2 | 85.8  | 11.0  | 74.8  | NA | NA | NA | NA | NA |
| Rescan | 1 | 18 | 13 | LCX  | 29.5 | 134.2 | 77.9  | 1.4   | 76.4  | 29.5 | 134.2 | 77.9  | 1.2   | 76.7  | NA | NA | NA | NA | NA |
| Rescan | 1 | 18 | 5  | LM   | 10.1 | 151.6 | 84.5  | 6.9   | 77.7  | 11.5 | 189.1 | 96.4  | 0.0   | 96.4  | NA | NA | NA | NA | NA |
| Rescan | 1 | 18 | 6  | pLAD | 18.2 | 134.4 | 98.4  | 4.8   | 93.7  | 23.5 | 183.2 | 123.7 | 0.0   | 123.7 | NA | NA | NA | NA | NA |
| Rescan | 1 | 18 | 7  | mLAD | 25.2 | 121.1 | 70.8  | 0.0   | 70.8  | 30.0 | 121.4 | 69.8  | 0.0   | 69.8  | NA | NA | NA | NA | NA |
| Rescan | 1 | 18 | 8  | dLAD | 38.0 | 172.8 | 76.2  | 0.0   | 76.2  | 49.0 | 212.6 | 94.1  | 0.0   | 94.1  | NA | NA | NA | NA | NA |
| Rescan | 1 | 18 | 1  | pRCA | 47.6 | 259.1 | 119.6 | 4.5   | 115.1 | 37.5 | 175.3 | 85.2  | 0.4   | 84.8  | NA | NA | NA | NA | NA |
| Rescan | 1 | 18 | 2  | mRCA | 14.9 | 59.4  | 35.2  | 0.4   | 34.7  | 9.5  | 43.7  | 15.7  | 0.9   | 14.8  | NA | NA | NA | NA | NA |
| Rescan | 1 | 19 | 1  | pRCA | 27.3 | 291.8 | 106.5 | 0.3   | 106.3 | 28.8 | 285.9 | 132.2 | 0.3   | 132.0 | NA | NA | NA | NA | NA |
| Rescan | 1 | 19 | 2  | mRCA | 27.7 | 196.8 | 90.2  | 0.0   | 90.2  | 29.6 | 196.9 | 96.6  | 0.0   | 96.6  | NA | NA | NA | NA | NA |
| Rescan | 1 | 19 | 3  | dRCA | 27.2 | 119.0 | 54.3  | 0.0   | 54.3  | 30.6 | 130.2 | 64.6  | 0.0   | 64.6  | NA | NA | NA | NA | NA |
| Rescan | 1 | 19 | 11 | pLCX | 25.4 | 212.6 | 110.4 | 1.3   | 109.1 | 25.4 | 212.6 | 110.4 | 1.3   | 109.1 | NA | NA | NA | NA | NA |
| Rescan | 1 | 19 | 13 | LCX  | 32.0 | 136.7 | 71.8  | 0.1   | 71.7  | 32.0 | 136.7 | 71.8  | 0.1   | 71.7  | NA | NA | NA | NA | NA |
| Rescan | 1 | 19 | 5  | LM   | 24.0 | 307.7 | 143.8 | 4.7   | 139.1 | 24.0 | 307.7 | 143.8 | 4.7   | 139.1 | NA | NA | NA | NA | NA |
| Rescan | 1 | 19 | 6  | pLAD | 17.8 | 154.3 | 59.4  | 1.9   | 57.5  | 21.0 | 176.0 | 87.1  | 1.9   | 85.2  | NA | NA | NA | NA | NA |
| Rescan | 1 | 19 | 7  | mLAD | 35.2 | 200.1 | 93.3  | 2.8   | 90.5  | 41.0 | 220.3 | 100.0 | 3.3   | 96.8  | NA | NA | NA | NA | NA |
| Rescan | 1 | 19 | 8  | dLAD | 23.6 | 103.7 | 36.1  | 0.0   | 36.1  | 32.5 | 111.0 | 47.4  | 0.0   | 47.4  | NA | NA | NA | NA | NA |
| Rescan | 1 | 20 | 1  | pRCA | 35.1 | 236.8 | 246.0 | 44.7  | 201.2 | 36.5 | 245.1 | 250.0 | 44.0  | 206.0 | NA | NA | NA | NA | NA |
| Rescan | 1 | 20 | 2  | mRCA | 33.8 | 171.3 | 111.6 | 7.5   | 104.1 | 39.0 | 191.7 | 118.9 | 7.2   | 111.7 | NA | NA | NA | NA | NA |
| Rescan | 1 | 20 | 3  | dRCA | 29.9 | 114.3 | 60.4  | 0.0   | 60.4  | 38.5 | 143.2 | 92.7  | 11.8  | 80.9  | NA | NA | NA | NA | NA |
| Rescan | 1 | 20 | 11 | pLCX | 31.5 | 289.9 | 246.2 | 61.6  | 184.7 | 31.5 | 289.9 | 246.2 | 61.6  | 184.7 | NA | NA | NA | NA | NA |
| Rescan | 1 | 20 | 13 | LCX  | 46.7 | 160.2 | 170.7 | 40.7  | 130.0 | 49.7 | 167.8 | 177.5 | 40.7  | 136.8 | NA | NA | NA | NA | NA |
| Rescan | 1 | 20 | 5  | LM   | 8.3  | 113.5 | 86.2  | 19.3  | 67.0  | 9.5  | 151.2 | 100.2 | 10.2  | 90.0  | NA | NA | NA | NA | NA |

|        |   |    |    |      |      |       |       |       |       |      |       |       |       |       |      |       |       |       |       |
|--------|---|----|----|------|------|-------|-------|-------|-------|------|-------|-------|-------|-------|------|-------|-------|-------|-------|
| Rescan | 1 | 20 | 6  | pLAD | 20.5 | 126.9 | 259.8 | 150.6 | 109.2 | 22.5 | 132.1 | 299.0 | 152.5 | 146.5 | NA   | NA    | NA    | NA    | NA    |
| Rescan | 1 | 20 | 7  | mLAD | 27.7 | 58.2  | 393.9 | 293.4 | 100.4 | 30.5 | 65.0  | 389.9 | 249.6 | 140.3 | NA   | NA    | NA    | NA    | NA    |
| Rescan | 1 | 20 | 8  | dLAD | 77.9 | 232.0 | 191.7 | 55.7  | 136.0 | 81.5 | 241.7 | 164.1 | 32.3  | 131.9 | NA   | NA    | NA    | NA    | NA    |
| Rescan | 2 | 21 | 11 | pLCX | 12.5 | 105.7 | 53.7  | 7.4   | 46.3  | 12.5 | 105.7 | 53.7  | 7.4   | 46.3  | 12.5 | 105.7 | 53.7  | 7.4   | 46.3  |
| Rescan | 2 | 21 | 13 | LCX  | 38.0 | 224.9 | 228.0 | 39.1  | 188.9 | 38.0 | 224.9 | 228.0 | 39.1  | 188.9 | 38.0 | 224.9 | 228.0 | 39.1  | 188.9 |
| Rescan | 2 | 21 | 1  | pRCA | 27.5 | 251.0 | 150.8 | 31.9  | 118.9 | 27.5 | 251.0 | 150.8 | 31.9  | 118.9 | 27.5 | 251.0 | 150.8 | 31.9  | 118.9 |
| Rescan | 2 | 21 | 2  | mRCA | 31.5 | 263.1 | 119.3 | 8.4   | 110.9 | 31.5 | 263.1 | 119.3 | 8.4   | 110.9 | 31.5 | 263.1 | 119.3 | 8.4   | 110.9 |
| Rescan | 2 | 21 | 3  | dRCA | 43.8 | 192.4 | 128.8 | 0.0   | 128.8 | 20.2 | 85.3  | 69.0  | 0.0   | 69.0  | 43.8 | 192.4 | 128.8 | 0.0   | 128.8 |
| Rescan | 2 | 21 | 5  | LM   | 10.5 | 145.4 | 45.5  | 0.2   | 45.3  | 10.5 | 145.4 | 45.5  | 0.2   | 45.3  | 10.5 | 145.4 | 45.5  | 0.2   | 45.3  |
| Rescan | 2 | 21 | 6  | pLAD | 18.5 | 238.8 | 104.4 | 18.8  | 85.6  | 18.5 | 238.8 | 104.4 | 18.8  | 85.6  | 18.5 | 240.8 | 102.4 | 20.0  | 82.5  |
| Rescan | 2 | 21 | 7  | mLAD | 30.0 | 250.6 | 266.8 | 119.2 | 147.6 | 30.0 | 250.6 | 266.8 | 119.2 | 147.6 | 30.0 | 250.6 | 266.8 | 119.1 | 147.7 |
| Rescan | 2 | 21 | 8  | dLAD | 48.7 | 185.8 | 161.9 | 23.3  | 138.5 | 66.0 | 242.5 | 208.4 | 23.3  | 185.0 | 48.7 | 186.4 | 161.3 | 22.7  | 138.7 |
| Rescan | 2 | 22 | 5  | LM   | 15.0 | 205.4 | 68.6  | 0.0   | 68.6  | 15.0 | 205.4 | 68.6  | 0.0   | 68.6  | 15.0 | 205.4 | 68.6  | 0.0   | 68.6  |
| Rescan | 2 | 22 | 6  | pLAD | 20.0 | 177.1 | 74.0  | 0.0   | 74.0  | 20.0 | 177.1 | 74.0  | 0.0   | 74.0  | 19.2 | 169.3 | 70.9  | 0.0   | 70.9  |
| Rescan | 2 | 22 | 7  | mLAD | 41.5 | 336.1 | 134.1 | 0.2   | 133.9 | 41.5 | 336.1 | 134.1 | 0.2   | 133.9 | 42.7 | 345.3 | 138.3 | 0.2   | 138.1 |
| Rescan | 2 | 22 | 8  | dLAD | 43.3 | 163.9 | 113.9 | 0.0   | 113.9 | 53.2 | 206.0 | 132.8 | 0.0   | 132.8 | 43.0 | 162.4 | 112.9 | 0.0   | 112.9 |
| Rescan | 2 | 22 | 11 | pLCX | 11.7 | 95.6  | 44.8  | 0.8   | 44.1  | 11.5 | 93.1  | 43.7  | 0.8   | 42.9  | 11.7 | 103.4 | 37.0  | 0.6   | 36.3  |
| Rescan | 2 | 22 | 13 | LCX  | 40.9 | 203.5 | 81.3  | 0.3   | 81.1  | 40.9 | 203.5 | 81.3  | 0.3   | 81.1  | 40.9 | 203.5 | 81.3  | 0.3   | 81.1  |
| Rescan | 2 | 22 | 1  | pRCA | 25.5 | 157.7 | 70.2  | 0.0   | 70.2  | 29.4 | 186.3 | 81.4  | 0.0   | 81.4  | 25.5 | 157.7 | 70.2  | 0.0   | 70.2  |
| Rescan | 2 | 22 | 2  | mRCA | 33.4 | 221.1 | 96.8  | 0.0   | 96.8  | 29.5 | 192.5 | 85.7  | 0.0   | 85.7  | 36.3 | 236.2 | 109.0 | 0.0   | 109.0 |
| Rescan | 2 | 22 | 3  | dRCA | 20.9 | 102.0 | 50.7  | 0.0   | 50.7  | 25.1 | 114.7 | 59.8  | 0.0   | 59.8  | 18.5 | 88.8  | 39.9  | 0.0   | 39.9  |
| Rescan | 2 | 23 | 1  | pRCA | 36.4 | 217.5 | 360.2 | 177.9 | 182.3 | 36.4 | 217.5 | 360.2 | 177.9 | 182.3 | 36.8 | 259.7 | 344.9 | 164.2 | 180.7 |
| Rescan | 2 | 23 | 2  | mRCA | 27.5 | 144.1 | 194.8 | 75.9  | 118.9 | 27.5 | 144.1 | 194.8 | 75.9  | 118.9 | 29.0 | 151.7 | 219.1 | 89.6  | 129.5 |
| Rescan | 2 | 23 | 3  | dRCA | 19.1 | 70.5  | 87.7  | 44.4  | 43.3  | 19.1 | 70.5  | 87.7  | 44.4  | 43.3  | 17.4 | 66.7  | 72.1  | 33.6  | 38.5  |
| Rescan | 2 | 23 | 11 | pLCX | 11.3 | 42.4  | 196.6 | 141.4 | 55.2  | 11.3 | 42.4  | 196.6 | 141.4 | 55.2  | 11.4 | 40.8  | 217.2 | 163.0 | 54.2  |
| Rescan | 2 | 23 | 13 | LCX  | 13.1 | 43.7  | 61.4  | 22.5  | 38.9  | 13.1 | 43.7  | 61.4  | 22.5  | 38.9  | 16.7 | 55.8  | 84.4  | 31.5  | 52.8  |
| Rescan | 2 | 23 | 5  | LM   | 16.8 | 111.3 | 156.2 | 22.5  | 133.7 | 16.8 | 111.3 | 156.2 | 22.5  | 133.7 | 19.3 | 133.7 | 180.0 | 30.4  | 149.6 |
| Rescan | 2 | 23 | 6  | pLAD | 22.0 | 115.1 | 281.7 | 171.6 | 110.1 | 22.0 | 115.1 | 281.7 | 172.2 | 109.5 | 19.7 | 107.8 | 246.8 | 146.4 | 100.4 |
| Rescan | 2 | 23 | 7  | mLAD | 16.5 | 42.5  | 96.5  | 53.2  | 43.3  | 16.5 | 42.5  | 96.5  | 54.0  | 42.5  | 17.7 | 44.5  | 114.0 | 70.4  | 43.6  |
| Rescan | 2 | 23 | 8  | dLAD | 9.8  | 26.1  | 26.1  | 4.8   | 21.3  | 9.8  | 26.1  | 26.1  | 5.0   | 21.1  | 9.0  | 21.4  | 22.5  | 4.8   | 17.7  |
| Rescan | 2 | 24 | 5  | LM   | 9.0  | 127.4 | 31.5  | 0.0   | 31.5  | 9.0  | 127.4 | 31.5  | 0.0   | 31.5  | 8.4  | 110.6 | 29.1  | 0.0   | 29.1  |
| Rescan | 2 | 24 | 6  | pLAD | 15.0 | 112.8 | 45.2  | 0.0   | 45.2  | 15.0 | 112.8 | 45.2  | 0.0   | 45.2  | 15.9 | 126.1 | 41.7  | 0.0   | 41.7  |
| Rescan | 2 | 24 | 7  | mLAD | 30.0 | 146.3 | 93.3  | 14.1  | 79.2  | 30.0 | 146.3 | 93.3  | 14.1  | 79.2  | 31.4 | 151.4 | 94.7  | 14.2  | 80.5  |
| Rescan | 2 | 24 | 8  | dLAD | 79.5 | 311.0 | 81.3  | 0.0   | 81.3  | 79.5 | 311.0 | 81.3  | 0.0   | 81.3  | 77.2 | 298.8 | 77.2  | 0.0   | 77.2  |

|        |   |    |    |      |      |        |       |      |       |      |        |       |      |       |      |        |       |      |       |
|--------|---|----|----|------|------|--------|-------|------|-------|------|--------|-------|------|-------|------|--------|-------|------|-------|
| Rescan | 2 | 24 | 1  | pRCA | 56.0 | 498.4  | 189.0 | 9.3  | 179.7 | 56.0 | 498.4  | 189.0 | 9.3  | 179.7 | 56.0 | 510.6  | 176.8 | 9.5  | 167.2 |
| Rescan | 2 | 24 | 2  | mRCA | 26.0 | 187.3  | 53.8  | 0.0  | 53.8  | 26.0 | 187.3  | 53.8  | 0.0  | 53.8  | 26.0 | 187.3  | 53.8  | 0.0  | 53.8  |
| Rescan | 2 | 24 | 11 | pLCX | 15.0 | 82.2   | 41.1  | 0.2  | 40.9  | 15.0 | 82.2   | 41.1  | 0.2  | 40.9  | 15.5 | 84.8   | 38.3  | 0.1  | 38.2  |
| Rescan | 2 | 24 | 13 | LCX  | 36.5 | 138.8  | 49.7  | 0.0  | 49.7  | 36.5 | 138.8  | 49.7  | 0.0  | 49.7  | 35.5 | 137.1  | 44.9  | 0.0  | 44.9  |
| Rescan | 2 | 25 | 13 | LCX  | 80.0 | 399.2  | 140.1 | 0.1  | 140.0 | 38.8 | 212.6  | 70.5  | 0.1  | 70.4  | 78.3 | 394.7  | 136.6 | 0.1  | 136.5 |
| Rescan | 2 | 25 | 1  | pRCA | 33.1 | 140.1  | 121.8 | 0.0  | 121.8 | 33.1 | 140.1  | 121.8 | 0.0  | 121.8 | 33.1 | 150.8  | 111.1 | 0.0  | 111.1 |
| Rescan | 2 | 25 | 2  | mRCA | 31.1 | 99.5   | 93.7  | 0.0  | 93.7  | 31.1 | 99.5   | 93.7  | 0.0  | 93.7  | 31.1 | 105.3  | 87.9  | 0.0  | 87.9  |
| Rescan | 2 | 25 | 3  | dRCA | 8.4  | 19.9   | 25.7  | 0.0  | 25.7  | 17.6 | 43.7   | 51.7  | 0.0  | 51.7  | 8.4  | 20.2   | 23.0  | 0.0  | 23.0  |
| Rescan | 2 | 25 | 7  | mLAD | 32.5 | 107.4  | 95.9  | 0.0  | 95.9  | 32.5 | 112.0  | 91.3  | 0.0  | 91.3  | 36.5 | 120.8  | 106.3 | 0.0  | 106.3 |
| Rescan | 2 | 25 | 8  | dLAD | 46.8 | 145.9  | 112.0 | 0.0  | 112.0 | 46.8 | 123.6  | 134.3 | 0.0  | 134.3 | 42.8 | 132.5  | 101.6 | 0.0  | 101.6 |
| Rescan | 2 | 26 | 1  | pRCA | 38.1 | 982.7  | 208.3 | 35.8 | 172.5 | 40.5 | 1046.7 | 219.8 | 36.4 | 183.3 | 40.7 | 1051.0 | 220.3 | 36.4 | 183.9 |
| Rescan | 2 | 26 | 2  | mRCA | 44.9 | 643.6  | 161.7 | 6.9  | 154.8 | 42.5 | 579.7  | 150.3 | 6.3  | 144.0 | 45.5 | 605.0  | 157.6 | 6.3  | 151.3 |
| Rescan | 2 | 26 | 3  | dRCA | 37.2 | 379.8  | 102.5 | 0.0  | 102.5 | 42.5 | 440.0  | 114.1 | 0.0  | 114.1 | 39.2 | 409.2  | 105.9 | 0.0  | 105.9 |
| Rescan | 2 | 26 | 11 | pLCX | 29.4 | 181.3  | 77.0  | 0.3  | 76.7  | 26.0 | 165.5  | 70.6  | 0.0  | 70.6  | 25.2 | 159.6  | 68.7  | 0.0  | 68.7  |
| Rescan | 2 | 26 | 13 | LCX  | 13.6 | 40.3   | 25.6  | 0.0  | 25.6  | 17.0 | 56.1   | 32.0  | 0.3  | 31.7  | 15.4 | 52.6   | 26.4  | 0.3  | 26.1  |
| Rescan | 2 | 26 | 5  | LM   | 17.5 | 302.8  | 67.2  | 0.0  | 67.2  | 17.5 | 302.8  | 67.2  | 0.0  | 67.2  | 17.5 | 302.8  | 67.2  | 0.0  | 67.2  |
| Rescan | 2 | 26 | 6  | pLAD | 13.0 | 169.4  | 48.7  | 0.0  | 48.7  | 13.0 | 169.4  | 48.7  | 0.0  | 48.7  | 13.0 | 169.4  | 48.7  | 0.0  | 48.7  |
| Rescan | 2 | 26 | 7  | mLAD | 17.5 | 278.0  | 65.0  | 6.4  | 58.7  | 17.5 | 278.0  | 65.0  | 6.4  | 58.7  | 17.5 | 273.7  | 69.4  | 9.6  | 59.8  |
| Rescan | 2 | 26 | 8  | dLAD | 33.4 | 146.0  | 66.0  | 0.4  | 65.6  | 33.4 | 146.0  | 66.0  | 0.4  | 65.6  | 33.4 | 146.0  | 66.0  | 0.4  | 65.6  |
| Rescan | 2 | 27 | 11 | pLCX | 12.4 | 215.2  | 47.5  | 0.0  | 47.5  | 12.4 | 215.2  | 47.5  | 0.0  | 47.5  | 13.7 | 242.5  | 52.3  | 0.0  | 52.3  |
| Rescan | 2 | 27 | 13 | LCX  | 33.0 | 330.0  | 149.1 | 25.5 | 123.7 | 33.0 | 330.0  | 149.1 | 25.5 | 123.7 | 33.0 | 330.0  | 149.1 | 25.5 | 123.7 |
| Rescan | 2 | 27 | 1  | pRCA | 45.4 | 1494.4 | 362.5 | 92.5 | 269.9 | 45.4 | 1494.4 | 362.5 | 92.5 | 269.9 | 45.4 | 1494.4 | 362.5 | 92.0 | 270.4 |
| Rescan | 2 | 27 | 2  | mRCA | 25.0 | 913.6  | 182.4 | 34.9 | 147.6 | 25.0 | 913.6  | 182.4 | 34.9 | 147.6 | 27.3 | 961.4  | 195.3 | 34.8 | 160.6 |
| Rescan | 2 | 27 | 3  | dRCA | 35.7 | 851.2  | 205.6 | 54.6 | 151.0 | 35.7 | 851.2  | 205.6 | 54.6 | 151.0 | 31.2 | 732.9  | 186.1 | 54.6 | 131.5 |
| Rescan | 2 | 27 | 5  | LM   | 15.3 | 308.1  | 68.8  | 0.0  | 68.8  | 16.5 | 336.1  | 72.5  | 0.0  | 72.5  | 15.3 | 317.1  | 59.7  | 0.0  | 59.7  |
| Rescan | 2 | 27 | 6  | pLAD | 27.2 | 443.0  | 156.3 | 11.5 | 144.8 | 26.0 | 415.0  | 152.5 | 10.8 | 141.7 | 27.2 | 470.6  | 128.7 | 8.4  | 120.3 |
| Rescan | 2 | 27 | 7  | mLAD | 19.4 | 132.4  | 73.6  | 8.1  | 65.5  | 19.4 | 132.4  | 73.6  | 7.7  | 65.9  | 19.4 | 138.7  | 67.2  | 7.8  | 59.4  |
| Rescan | 2 | 27 | 8  | dLAD | 17.9 | 53.2   | 45.8  | 0.0  | 45.8  | 17.9 | 53.2   | 45.8  | 0.0  | 45.8  | 17.9 | 58.1   | 40.9  | 0.0  | 40.9  |
| Rescan | 2 | 28 | 5  | LM   | 7.8  | 57.5   | 16.4  | 1.0  | 15.4  | 7.8  | 57.5   | 16.4  | 1.0  | 15.4  | 7.9  | 58.6   | 16.7  | 1.2  | 15.5  |
| Rescan | 2 | 28 | 6  | pLAD | 19.0 | 93.5   | 54.6  | 0.9  | 53.7  | 21.1 | 105.2  | 59.8  | 0.9  | 58.9  | 17.9 | 87.3   | 51.8  | 0.9  | 50.9  |
| Rescan | 2 | 28 | 7  | mLAD | 27.3 | 96.3   | 72.8  | 0.0  | 72.8  | 26.3 | 88.9   | 70.5  | 0.0  | 70.5  | 27.0 | 96.8   | 71.9  | 0.0  | 71.9  |
| Rescan | 2 | 28 | 8  | dLAD | 15.8 | 53.4   | 35.6  | 0.0  | 35.6  | 14.7 | 49.1   | 32.7  | 0.0  | 32.7  | 17.2 | 59.1   | 39.3  | 0.0  | 39.3  |
| Rescan | 2 | 28 | 11 | pLCX | 26.0 | 151.1  | 72.5  | 0.0  | 72.5  | 26.0 | 151.1  | 72.5  | 0.0  | 72.5  | 26.0 | 151.1  | 72.5  | 0.0  | 72.5  |
| Rescan | 2 | 28 | 13 | LCX  | 15.0 | 58.7   | 47.6  | 0.0  | 47.6  | 9.4  | 39.5   | 30.0  | 0.0  | 30.0  | 17.1 | 67.2   | 52.6  | 0.0  | 52.6  |

|        |   |    |    |      |      |       |       |       |       |      |       |       |       |       |      |       |       |       |       |
|--------|---|----|----|------|------|-------|-------|-------|-------|------|-------|-------|-------|-------|------|-------|-------|-------|-------|
| Rescan | 2 | 28 | 1  | pRCA | 38.7 | 252.0 | 129.0 | 0.3   | 128.7 | 40.0 | 261.6 | 131.9 | 0.3   | 131.6 | 37.9 | 245.8 | 126.3 | 0.3   | 126.0 |
| Rescan | 2 | 28 | 2  | mRCA | 29.8 | 187.0 | 101.5 | 0.1   | 101.5 | 31.1 | 188.9 | 106.5 | 0.1   | 106.4 | 32.6 | 202.2 | 110.5 | 0.1   | 110.4 |
| Rescan | 2 | 28 | 3  | dRCA | 38.5 | 160.2 | 103.4 | 0.5   | 102.9 | 36.0 | 148.7 | 95.6  | 0.5   | 95.1  | 35.5 | 148.1 | 95.6  | 0.5   | 95.1  |
| Rescan | 2 | 29 | 1  | pRCA | 36.9 | 209.8 | 76.8  | 8.6   | 68.3  | 34.3 | 185.0 | 67.6  | 0.7   | 66.9  | 36.1 | 205.7 | 75.9  | 7.6   | 68.3  |
| Rescan | 2 | 29 | 2  | mRCA | 32.8 | 188.4 | 44.7  | 0.0   | 44.7  | 32.8 | 188.4 | 44.7  | 0.0   | 44.7  | 32.7 | 188.6 | 44.5  | 0.0   | 44.5  |
| Rescan | 2 | 29 | 3  | dRCA | 17.4 | 46.8  | 24.0  | 0.0   | 24.0  | 17.4 | 46.8  | 24.0  | 0.0   | 24.0  | 18.3 | 50.6  | 25.2  | 0.0   | 25.2  |
| Rescan | 2 | 29 | 5  | LM   | 6.3  | 134.6 | 39.2  | 0.7   | 38.5  | 2.0  | 24.0  | 10.0  | 0.7   | 9.3   | 6.3  | 134.6 | 39.2  | 0.7   | 38.5  |
| Rescan | 2 | 29 | 6  | pLAD | 15.0 | 95.7  | 122.0 | 56.1  | 65.9  | 15.0 | 95.7  | 122.0 | 56.1  | 65.9  | 15.0 | 95.7  | 115.8 | 56.1  | 59.7  |
| Rescan | 2 | 29 | 7  | mLAD | 30.1 | 130.2 | 105.6 | 40.9  | 64.7  | 30.1 | 130.2 | 105.6 | 40.9  | 64.7  | 28.4 | 123.3 | 100.9 | 40.8  | 60.1  |
| Rescan | 2 | 29 | 8  | dLAD | 50.9 | 206.1 | 57.6  | 0.0   | 57.6  | 50.9 | 206.1 | 57.6  | 0.0   | 57.6  | 52.6 | 213.1 | 59.7  | 0.0   | 59.7  |
| Rescan | 2 | 29 | 11 | pLCX | 46.4 | 356.7 | 310.1 | 128.2 | 181.9 | 46.4 | 356.7 | 310.1 | 128.2 | 181.9 | 45.9 | 354.1 | 302.8 | 121.3 | 181.5 |
| Rescan | 2 | 29 | 13 | LCX  | 57.1 | 238.1 | 222.7 | 100.8 | 121.9 | 57.1 | 238.1 | 222.7 | 100.8 | 121.9 | 57.6 | 240.6 | 230.0 | 107.7 | 122.3 |
| Rescan | 2 | 30 | 5  | LM   | 10.5 | 105.3 | 46.5  | 0.0   | 46.5  | 10.5 | 105.3 | 46.5  | 0.0   | 46.5  | 10.5 | 116.6 | 35.2  | 0.0   | 35.2  |
| Rescan | 2 | 30 | 6  | pLAD | 6.1  | 28.7  | 35.6  | 19.9  | 15.6  | 6.1  | 28.7  | 35.6  | 19.9  | 15.6  | 7.2  | 30.6  | 45.2  | 27.9  | 17.3  |
| Rescan | 2 | 30 | 7  | mLAD | 34.1 | 61.8  | 255.1 | 182.4 | 72.7  | 34.1 | 61.8  | 255.1 | 182.4 | 72.7  | 31.5 | 51.9  | 241.4 | 173.3 | 68.1  |
| Rescan | 2 | 30 | 8  | dLAD | 26.4 | 59.4  | 72.1  | 22.1  | 50.0  | 32.3 | 72.2  | 84.2  | 22.1  | 62.1  | 27.9 | 67.5  | 76.2  | 20.1  | 56.1  |
| Rescan | 2 | 30 | 11 | pLCX | 25.0 | 85.6  | 102.0 | 50.1  | 51.9  | 25.0 | 85.6  | 102.0 | 50.4  | 51.6  | 25.3 | 86.6  | 103.1 | 50.4  | 52.7  |
| Rescan | 2 | 30 | 12 | OM1  | 48.5 | 132.5 | 178.4 | 71.5  | 106.9 | 48.5 | 132.5 | 178.4 | 72.0  | 106.4 | 48.2 | 131.5 | 177.3 | 71.2  | 106.1 |
| Rescan | 2 | 30 | 1  | pRCA | 30.3 | 242.3 | 202.1 | 90.7  | 111.4 | 28.0 | 181.9 | 184.8 | 90.7  | 94.1  | 30.3 | 242.3 | 202.1 | 91.5  | 110.6 |
| Rescan | 2 | 30 | 2  | mRCA | 33.0 | 151.9 | 194.2 | 94.0  | 100.2 | 33.0 | 151.9 | 194.2 | 94.0  | 100.2 | 34.9 | 161.0 | 199.7 | 95.1  | 104.5 |
| Rescan | 2 | 30 | 3  | dRCA | 32.5 | 138.0 | 122.3 | 47.3  | 75.0  | 32.5 | 138.0 | 122.3 | 47.3  | 75.0  | 31.5 | 136.3 | 121.2 | 49.1  | 72.1  |
| Rescan | 2 | 31 | 5  | LM   | 9.0  | 113.7 | 36.3  | 0.0   | 36.3  | 9.0  | 113.7 | 36.3  | 0.0   | 36.3  | 9.0  | 113.7 | 36.3  | 0.0   | 36.3  |
| Rescan | 2 | 31 | 6  | pLAD | 32.5 | 200.9 | 125.4 | 24.9  | 100.4 | 32.5 | 200.9 | 125.4 | 24.7  | 100.7 | 32.5 | 212.6 | 113.6 | 24.0  | 89.6  |
| Rescan | 2 | 31 | 7  | mLAD | 29.5 | 122.7 | 89.2  | 22.6  | 66.6  | 29.5 | 122.7 | 89.2  | 22.5  | 66.7  | 29.5 | 122.7 | 89.2  | 22.8  | 66.4  |
| Rescan | 2 | 31 | 8  | dLAD | 41.5 | 194.7 | 107.2 | 15.2  | 92.0  | 41.5 | 194.7 | 107.2 | 15.3  | 91.9  | 41.5 | 196.0 | 105.9 | 14.6  | 91.3  |
| Rescan | 2 | 31 | 11 | pLCX | 30.0 | 136.2 | 110.3 | 23.7  | 86.6  | 30.0 | 136.2 | 110.3 | 23.7  | 86.6  | 30.0 | 136.2 | 110.3 | 24.0  | 86.3  |
| Rescan | 2 | 31 | 12 | OM1  | 71.5 | 316.8 | 163.7 | 1.3   | 162.4 | 71.5 | 316.8 | 163.7 | 1.3   | 162.4 | 71.5 | 316.8 | 163.7 | 1.3   | 162.3 |
| Rescan | 2 | 31 | 1  | pRCA | 34.0 | 273.4 | 125.3 | 8.3   | 117.0 | 34.0 | 273.4 | 125.3 | 8.3   | 117.0 | 31.6 | 254.4 | 115.7 | 7.1   | 108.7 |
| Rescan | 2 | 31 | 2  | mRCA | 34.5 | 218.2 | 91.7  | 2.2   | 89.6  | 34.5 | 218.2 | 91.7  | 2.2   | 89.6  | 37.9 | 242.2 | 103.2 | 3.4   | 99.9  |
| Rescan | 2 | 31 | 3  | dRCA | 34.0 | 152.5 | 64.0  | 0.0   | 64.0  | 34.0 | 152.5 | 64.0  | 0.0   | 64.0  | 33.0 | 147.4 | 62.0  | 0.0   | 62.0  |
| Rescan | 2 | 32 | 11 | pLCX | 10.9 | 114.7 | 40.6  | 0.0   | 40.6  | 10.9 | 112.0 | 43.2  | 0.0   | 43.2  | 10.9 | 117.8 | 37.5  | 0.0   | 37.5  |
| Rescan | 2 | 32 | 13 | LCX  | 35.9 | 330.6 | 98.2  | 0.0   | 98.2  | 35.9 | 279.0 | 149.8 | 0.0   | 149.8 | 35.9 | 342.4 | 86.4  | 0.0   | 86.4  |
| Rescan | 2 | 32 | 1  | pRCA | 33.7 | 284.7 | 111.0 | 0.9   | 110.1 | 33.7 | 284.7 | 111.0 | 0.9   | 110.1 | 33.9 | 287.3 | 112.2 | 0.9   | 111.3 |
| Rescan | 2 | 32 | 2  | mRCA | 34.9 | 210.7 | 108.1 | 5.5   | 102.6 | 34.9 | 210.7 | 108.1 | 5.5   | 102.6 | 33.1 | 202.9 | 104.8 | 5.5   | 99.2  |

|        |   |    |    |      |      |       |       |       |       |      |       |       |       |       |      |       |       |       |       |
|--------|---|----|----|------|------|-------|-------|-------|-------|------|-------|-------|-------|-------|------|-------|-------|-------|-------|
| Rescan | 2 | 32 | 3  | dRCA | 34.2 | 114.1 | 87.2  | 16.8  | 70.4  | 42.1 | 140.0 | 99.1  | 16.8  | 82.3  | 32.7 | 111.0 | 82.8  | 15.7  | 67.1  |
| Rescan | 2 | 32 | 5  | LM   | 9.0  | 166.2 | 40.7  | 0.0   | 40.7  | 9.0  | 166.2 | 40.7  | 0.0   | 40.7  | 9.0  | 166.5 | 40.4  | 0.0   | 40.4  |
| Rescan | 2 | 32 | 6  | pLAD | 22.3 | 173.2 | 82.1  | 6.5   | 75.7  | 22.3 | 173.2 | 82.1  | 6.1   | 76.0  | 22.3 | 176.6 | 78.7  | 6.5   | 72.2  |
| Rescan | 2 | 32 | 7  | mLAD | 15.3 | 55.9  | 68.1  | 31.6  | 36.5  | 8.2  | 40.8  | 39.7  | 11.5  | 28.2  | 14.8 | 61.4  | 59.5  | 26.0  | 33.5  |
| Rescan | 2 | 33 | 11 | pLCX | 19.2 | 153.5 | 56.6  | 0.5   | 56.1  | 19.2 | 143.6 | 66.6  | 1.3   | 65.3  | 19.3 | 154.4 | 56.8  | 0.5   | 56.3  |
| Rescan | 2 | 33 | 12 | OM1  | 55.6 | 241.0 | 124.6 | 0.0   | 124.5 | 55.0 | 193.3 | 166.4 | 0.0   | 166.4 | 56.2 | 244.7 | 127.5 | 0.2   | 127.4 |
| Rescan | 2 | 33 | 1  | pRCA | 23.5 | 65.8  | 111.1 | 21.8  | 89.4  | 22.8 | 64.9  | 107.3 | 20.0  | 87.3  | 23.5 | 65.8  | 94.7  | 21.7  | 73.0  |
| Rescan | 2 | 33 | 2  | mRCA | 47.1 | 107.8 | 153.8 | 11.2  | 142.6 | 47.7 | 108.6 | 157.6 | 13.0  | 144.6 | 47.1 | 107.8 | 116.8 | 11.2  | 105.6 |
| Rescan | 2 | 33 | 3  | dRCA | 42.5 | 75.9  | 101.9 | 2.8   | 99.1  | 42.5 | 75.9  | 101.9 | 2.8   | 99.1  | 42.5 | 75.9  | 76.1  | 2.8   | 73.3  |
| Rescan | 2 | 33 | 5  | LM   | 9.5  | 109.1 | 53.7  | 12.5  | 41.2  | 9.5  | 109.1 | 53.7  | 12.5  | 41.2  | 10.7 | 130.4 | 65.1  | 18.7  | 46.4  |
| Rescan | 2 | 33 | 6  | pLAD | 16.7 | 45.2  | 148.7 | 57.7  | 90.9  | 16.7 | 45.2  | 148.7 | 59.1  | 89.5  | 15.6 | 42.7  | 137.0 | 52.4  | 84.5  |
| Rescan | 2 | 33 | 7  | mLAD | 36.5 | 99.2  | 193.3 | 62.6  | 130.7 | 36.5 | 99.2  | 193.3 | 62.7  | 130.6 | 30.9 | 89.1  | 163.1 | 50.1  | 113.0 |
| Rescan | 2 | 33 | 8  | dLAD | 74.2 | 169.0 | 205.9 | 29.6  | 176.3 | 78.1 | 178.5 | 214.9 | 28.1  | 186.9 | 80.9 | 181.6 | 247.8 | 48.0  | 199.8 |
| Rescan | 2 | 34 | 5  | LM   | 18.3 | 249.3 | 99.9  | 32.1  | 67.8  | 18.9 | 258.9 | 106.3 | 32.1  | 74.2  | 17.6 | 245.8 | 90.7  | 24.0  | 66.7  |
| Rescan | 2 | 34 | 6  | pLAD | 23.6 | 158.9 | 138.5 | 74.4  | 64.1  | 23.6 | 158.9 | 138.5 | 74.4  | 64.1  | 25.3 | 170.3 | 150.9 | 84.4  | 66.6  |
| Rescan | 2 | 34 | 7  | mLAD | 30.0 | 106.3 | 98.2  | 18.6  | 79.6  | 30.0 | 106.3 | 98.2  | 18.6  | 79.6  | 26.5 | 91.9  | 90.9  | 16.5  | 74.4  |
| Rescan | 2 | 34 | 8  | dLAD | 35.8 | 103.6 | 69.2  | 0.0   | 69.2  | 40.0 | 115.3 | 78.6  | 0.0   | 78.6  | 38.4 | 110.0 | 73.3  | 0.0   | 73.3  |
| Rescan | 2 | 34 | 1  | pRCA | 31.0 | 397.6 | 182.1 | 60.1  | 122.0 | 31.0 | 397.6 | 182.1 | 59.7  | 122.4 | 30.1 | 389.8 | 177.9 | 60.1  | 117.8 |
| Rescan | 2 | 34 | 2  | mRCA | 35.0 | 347.0 | 167.0 | 18.6  | 148.4 | 35.0 | 347.0 | 167.0 | 18.5  | 148.5 | 37.1 | 363.4 | 175.5 | 18.6  | 156.9 |
| Rescan | 2 | 34 | 3  | dRCA | 36.2 | 188.8 | 191.0 | 93.0  | 98.0  | 34.5 | 185.2 | 185.1 | 90.1  | 95.0  | 33.6 | 177.0 | 182.2 | 91.0  | 91.2  |
| Rescan | 2 | 34 | 11 | pLCX | 15.0 | 137.2 | 85.5  | 34.5  | 51.0  | 15.0 | 137.2 | 85.5  | 34.9  | 50.6  | 16.8 | 150.9 | 95.8  | 38.7  | 57.1  |
| Rescan | 2 | 34 | 13 | LCX  | 38.0 | 141.7 | 113.6 | 0.0   | 113.6 | 38.0 | 141.7 | 113.6 | 0.0   | 113.6 | 36.8 | 134.6 | 109.3 | 0.0   | 109.3 |
| Rescan | 2 | 35 | 5  | LM   | 6.0  | 112.7 | 21.2  | 0.0   | 21.2  | 6.0  | 112.7 | 21.2  | 0.0   | 21.2  | 6.0  | 112.7 | 21.2  | 0.0   | 21.2  |
| Rescan | 2 | 35 | 6  | pLAD | 12.6 | 127.5 | 30.3  | 1.9   | 28.3  | 12.0 | 121.0 | 27.7  | 0.0   | 27.7  | 12.6 | 127.5 | 30.3  | 1.9   | 28.3  |
| Rescan | 2 | 35 | 7  | mLAD | 24.8 | 73.9  | 161.5 | 119.3 | 42.3  | 25.5 | 80.5  | 164.1 | 121.2 | 42.9  | 24.8 | 73.9  | 161.5 | 119.3 | 42.3  |
| Rescan | 2 | 35 | 8  | dLAD | 79.0 | 304.6 | 165.1 | 1.1   | 164.0 | 79.0 | 304.6 | 165.1 | 1.1   | 164.0 | 79.0 | 304.6 | 165.1 | 1.1   | 164.0 |
| Rescan | 2 | 35 | 11 | pLCX | 11.0 | 68.4  | 46.1  | 2.1   | 44.0  | 11.0 | 68.4  | 46.1  | 2.1   | 44.0  | 9.6  | 56.7  | 38.6  | 0.6   | 38.0  |
| Rescan | 2 | 35 | 12 | OM1  | 66.5 | 227.1 | 207.7 | 21.4  | 186.3 | 66.5 | 227.1 | 207.7 | 21.4  | 186.3 | 67.4 | 232.8 | 211.5 | 22.2  | 189.3 |
| Rescan | 2 | 35 | 1  | pRCA | 33.5 | 190.1 | 147.1 | 37.8  | 109.3 | 33.5 | 190.1 | 147.1 | 37.8  | 109.3 | 33.5 | 190.1 | 147.1 | 37.8  | 109.3 |
| Rescan | 2 | 35 | 2  | mRCA | 36.0 | 164.4 | 99.8  | 0.0   | 99.8  | 36.0 | 164.4 | 99.8  | 0.0   | 99.8  | 41.1 | 184.9 | 118.6 | 0.0   | 118.6 |
| Rescan | 2 | 35 | 3  | dRCA | 40.2 | 169.4 | 103.2 | 0.0   | 103.2 | 36.5 | 155.3 | 95.2  | 0.0   | 95.2  | 46.4 | 186.1 | 112.2 | 0.0   | 112.2 |
| Rescan | 2 | 36 | 1  | pRCA | 41.3 | 293.4 | 165.8 | 16.5  | 149.2 | 41.3 | 293.4 | 165.8 | 16.5  | 149.2 | 43.8 | 310.3 | 175.5 | 16.5  | 159.0 |
| Rescan | 2 | 36 | 2  | mRCA | 48.8 | 262.1 | 133.2 | 0.0   | 133.2 | 48.8 | 262.1 | 133.2 | 0.0   | 133.2 | 47.3 | 254.0 | 128.6 | 0.0   | 128.6 |
| Rescan | 2 | 36 | 3  | dRCA | 49.8 | 162.5 | 114.3 | 0.0   | 114.3 | 49.8 | 162.5 | 114.3 | 0.0   | 114.3 | 52.1 | 170.5 | 120.1 | 0.0   | 120.1 |

|        |   |    |    |      |       |       |       |       |       |       |       |       |       |       |       |       |       |       |       |
|--------|---|----|----|------|-------|-------|-------|-------|-------|-------|-------|-------|-------|-------|-------|-------|-------|-------|-------|
| Rescan | 2 | 36 | 11 | pLCX | 15.3  | 87.0  | 65.1  | 14.6  | 50.5  | 12.8  | 77.3  | 51.7  | 9.3   | 42.4  | 16.1  | 87.1  | 68.0  | 14.6  | 53.4  |
| Rescan | 2 | 36 | 13 | LCX  | 50.3  | 138.0 | 114.0 | 0.1   | 113.9 | 52.9  | 147.8 | 127.4 | 5.4   | 122.0 | 49.2  | 134.1 | 110.2 | 0.1   | 110.1 |
| Rescan | 2 | 36 | 5  | LM   | 6.3   | 128.2 | 28.4  | 0.0   | 28.4  | 6.3   | 128.2 | 28.4  | 0.0   | 28.4  | 6.7   | 133.1 | 29.5  | 0.0   | 29.5  |
| Rescan | 2 | 36 | 6  | pLAD | 16.0  | 113.6 | 54.0  | 9.2   | 44.8  | 16.0  | 113.6 | 54.0  | 9.2   | 44.8  | 16.3  | 115.1 | 59.0  | 12.7  | 46.3  |
| Rescan | 2 | 36 | 7  | mLAD | 34.0  | 183.6 | 151.8 | 34.2  | 117.7 | 34.0  | 183.6 | 151.8 | 34.5  | 117.3 | 32.3  | 171.5 | 143.4 | 30.6  | 112.8 |
| Rescan | 2 | 36 | 8  | dLAD | 68.1  | 211.5 | 164.8 | 0.0   | 164.8 | 68.1  | 211.5 | 164.8 | 0.0   | 164.8 | 69.2  | 217.2 | 167.2 | 0.0   | 167.2 |
| Rescan | 2 | 37 | 1  | pRCA | 24.7  | 142.6 | 91.3  | 1.1   | 90.2  | 24.7  | 142.6 | 91.3  | 1.1   | 90.2  | 25.6  | 146.9 | 94.7  | 1.1   | 93.5  |
| Rescan | 2 | 37 | 2  | mRCA | 51.6  | 259.8 | 131.1 | 0.0   | 131.1 | 51.6  | 259.8 | 131.1 | 0.0   | 131.1 | 56.0  | 277.8 | 137.9 | 0.0   | 137.9 |
| Rescan | 2 | 37 | 3  | dRCA | 38.6  | 137.1 | 81.0  | 0.0   | 81.0  | 38.6  | 137.1 | 81.0  | 0.0   | 81.0  | 33.4  | 114.9 | 70.8  | 0.0   | 70.8  |
| Rescan | 2 | 37 | 11 | pLCX | 65.3  | 285.9 | 134.1 | 1.8   | 132.4 | 65.3  | 285.9 | 134.1 | 1.8   | 132.4 | 64.1  | 281.9 | 131.6 | 1.8   | 129.9 |
| Rescan | 2 | 37 | 13 | LCX  | 21.2  | 63.5  | 40.2  | 0.0   | 40.2  | 21.2  | 63.5  | 40.2  | 0.0   | 40.2  | 22.4  | 67.5  | 42.7  | 0.0   | 42.7  |
| Rescan | 2 | 37 | 5  | LM   | 10.5  | 65.6  | 36.8  | 0.0   | 36.8  | 10.5  | 65.6  | 36.8  | 0.0   | 36.8  | 9.9   | 60.1  | 33.5  | 0.0   | 33.5  |
| Rescan | 2 | 37 | 6  | pLAD | 25.6  | 136.4 | 76.2  | 0.0   | 76.2  | 25.6  | 136.4 | 76.2  | 0.0   | 76.2  | 25.1  | 134.4 | 73.5  | 0.0   | 73.5  |
| Rescan | 2 | 37 | 7  | mLAD | 26.4  | 113.0 | 79.8  | 7.0   | 72.8  | 26.4  | 113.0 | 79.8  | 7.0   | 72.8  | 27.7  | 119.2 | 84.0  | 7.0   | 77.1  |
| Rescan | 2 | 37 | 8  | dLAD | 37.0  | 130.0 | 86.0  | 0.0   | 86.0  | 37.0  | 130.0 | 86.0  | 0.0   | 86.0  | 36.6  | 128.1 | 85.3  | 0.0   | 85.3  |
| Rescan | 2 | 38 | 1  | pRCA | 36.7  | 170.9 | 70.8  | 14.1  | 56.7  | 37.0  | 172.0 | 71.2  | 14.0  | 57.1  | 37.0  | 171.8 | 71.1  | 14.1  | 57.0  |
| Rescan | 2 | 38 | 2  | mRCA | 38.3  | 134.5 | 38.4  | 0.0   | 38.4  | 38.0  | 133.4 | 38.0  | 0.0   | 38.0  | 38.0  | 133.6 | 38.1  | 0.0   | 38.1  |
| Rescan | 2 | 38 | 3  | dRCA | 42.0  | 121.3 | 38.6  | 0.0   | 38.6  | 42.0  | 121.3 | 38.6  | 0.0   | 38.6  | 42.0  | 121.3 | 38.6  | 0.0   | 38.6  |
| Rescan | 2 | 38 | 11 | pLCX | 6.4   | 31.9  | 18.4  | 1.3   | 17.1  | 5.9   | 30.0  | 15.8  | 0.4   | 15.5  | 8.0   | 39.7  | 25.6  | 3.2   | 22.4  |
| Rescan | 2 | 38 | 13 | LCX  | 104.0 | 394.0 | 142.9 | 20.2  | 122.7 | 104.5 | 396.0 | 145.5 | 21.1  | 124.4 | 103.1 | 391.3 | 138.5 | 18.3  | 120.2 |
| Rescan | 2 | 38 | 5  | LM   | 8.5   | 70.1  | 81.8  | 35.9  | 45.9  | 8.5   | 65.8  | 86.1  | 35.9  | 50.2  | 9.2   | 80.6  | 85.5  | 35.9  | 49.7  |
| Rescan | 2 | 38 | 6  | pLAD | 11.1  | 99.7  | 73.5  | 19.3  | 54.2  | 11.1  | 93.0  | 80.3  | 19.6  | 60.6  | 11.1  | 99.7  | 73.5  | 19.3  | 54.2  |
| Rescan | 2 | 38 | 7  | mLAD | 31.9  | 132.7 | 256.6 | 133.7 | 122.9 | 32.9  | 137.1 | 258.8 | 134.9 | 123.9 | 30.9  | 128.9 | 254.1 | 133.0 | 121.1 |
| Rescan | 2 | 38 | 8  | dLAD | 45.5  | 139.1 | 47.4  | 1.2   | 46.2  | 44.4  | 134.7 | 45.2  | 0.1   | 45.1  | 46.5  | 142.9 | 49.9  | 1.9   | 48.0  |
| Rescan | 2 | 39 | 1  | pRCA | 55.3  | 369.8 | 99.2  | 0.0   | 99.2  | 55.3  | 369.8 | 99.2  | 0.0   | 99.2  | 55.3  | 369.8 | 99.2  | 0.0   | 99.2  |
| Rescan | 2 | 39 | 2  | mRCA | 53.0  | 250.5 | 97.2  | 0.2   | 97.1  | 53.0  | 250.5 | 97.2  | 0.2   | 97.1  | 53.0  | 250.5 | 97.2  | 0.2   | 97.1  |
| Rescan | 2 | 39 | 3  | dRCA | 15.7  | 93.3  | 58.2  | 1.4   | 56.8  | 15.7  | 93.3  | 58.2  | 1.4   | 56.8  | 15.8  | 93.6  | 58.3  | 1.4   | 56.9  |
| Rescan | 2 | 39 | 11 | pLCX | 19.3  | 78.6  | 27.6  | 0.0   | 27.5  | 19.3  | 78.6  | 27.6  | 0.0   | 27.5  | 19.3  | 78.6  | 27.6  | 0.0   | 27.5  |
| Rescan | 2 | 39 | 13 | LCX  | 11.0  | 25.7  | 11.1  | 0.1   | 11.1  | 11.0  | 25.7  | 11.1  | 0.1   | 11.1  | 9.7   | 22.4  | 9.3   | 0.1   | 9.3   |
| Rescan | 2 | 39 | 6  | pLAD | 35.7  | 74.8  | 43.9  | 4.6   | 39.3  | 35.7  | 74.8  | 43.9  | 4.6   | 39.3  | 35.7  | 74.8  | 43.9  | 4.6   | 39.3  |
| Rescan | 2 | 39 | 5  | LM   | 10.5  | 125.6 | 40.1  | 0.0   | 40.1  | 10.5  | 125.6 | 40.1  | 0.0   | 40.1  | 10.5  | 125.6 | 40.1  | 0.0   | 40.1  |
| Rescan | 2 | 40 | 6  | pLAD | 23.5  | 239.9 | 86.6  | 0.0   | 86.5  | 23.5  | 239.9 | 86.6  | 0.0   | 86.5  | 23.5  | 239.9 | 86.6  | 0.0   | 86.5  |
| Rescan | 2 | 40 | 7  | mLAD | 30.0  | 141.7 | 90.9  | 0.0   | 90.9  | 30.0  | 141.7 | 90.9  | 0.0   | 90.9  | 30.0  | 141.7 | 90.9  | 0.0   | 90.9  |
| Rescan | 2 | 40 | 8  | dLAD | 43.4  | 116.8 | 125.7 | 0.0   | 125.7 | 49.5  | 129.6 | 144.2 | 0.0   | 144.2 | 43.4  | 116.8 | 125.7 | 0.0   | 125.7 |

|        |   |    |    |      |      |       |       |     |       |      |       |       |     |       |      |       |       |     |       |
|--------|---|----|----|------|------|-------|-------|-----|-------|------|-------|-------|-----|-------|------|-------|-------|-----|-------|
| Rescan | 2 | 40 | 1  | pRCA | 38.5 | 280.5 | 141.8 | 2.0 | 139.8 | 38.5 | 280.5 | 141.8 | 2.2 | 139.6 | 37.6 | 254.4 | 134.3 | 0.9 | 133.5 |
| Rescan | 2 | 40 | 2  | mRCA | 39.0 | 186.2 | 131.8 | 0.0 | 131.8 | 39.0 | 186.2 | 131.8 | 0.0 | 131.8 | 36.9 | 179.8 | 124.6 | 0.0 | 124.6 |
| Rescan | 2 | 40 | 3  | dRCA | 36.8 | 113.5 | 99.7  | 0.0 | 99.7  | 38.5 | 117.5 | 104.1 | 0.0 | 104.1 | 40.5 | 123.7 | 111.1 | 0.0 | 111.1 |
| Rescan | 2 | 40 | 11 | pLCX | 5.0  | 45.5  | 19.2  | 0.0 | 19.2  | 5.0  | 45.5  | 19.2  | 0.0 | 19.2  | 5.0  | 45.5  | 19.2  | 0.0 | 19.2  |
| Rescan | 2 | 40 | 13 | LCX  | 40.1 | 173.5 | 107.8 | 0.0 | 107.8 | 41.2 | 177.9 | 110.8 | 0.0 | 110.8 | 40.1 | 173.5 | 107.8 | 0.0 | 107.8 |

Note.—AHA = American Heart Association, d = distal, LCX = left circumflex, LM = left main, m = mid, NA = not applicable, OM1 = first obtuse marginal, p = proximal, RCA = right coronary artery.
